# Supplementary material for: Diverse organic carbon dynamics captured by radiocarbon analysis of distinct compound classes in a grassland soil
Source: Copernicus journal article supplement (doi:10.5194/egusphere-2023-3125), 2024-01-08
Supplement: Supplementary file 1 [file egusphere-2023-3125-supplement-version3.zip]

## Sheet: SI Table S1
CAMS ID	Size Fraction	Extraction (if applicable)	Soil depth (cm)	replicate	δ13C (‰)	F14C ± err	∆14C ± err (‰)	14C age ± err (‰)	TOC (%)	C:N	Extracted C (μgC /g sample)	% of TOC in each fraction
188097	<2mm	n.a.	0-10	n.a.	-27.965	1.0396 ± 0.0029	31 ± 3	modern	3.13564	11.6978	NA	n.a.
188094	<2mm	n.a.	10-20	n.a.	-26.155	0.987 ± 0.0029	-22 ± 3	105 ± 25	1.2193	9.46146	NA	n.a.
188091	<2mm	n.a.	20-50	n.a.	-25.3	0.8914 ± 0.0027	-116 ± 3	925 ± 25	0.502273	5.87912	NA	n.a.
188088	<2mm	n.a.	50-100	n.a.	-23.86	0.5363 ± 0.0028	-468± 3	5005 ± 45	0.253323	3.79441	NA	n.a.
188098	2mm - 63μm	n.a.	0-10	n.a.	-28.075	1.0344 ± 0.0031	25± 3	>modern	2.68337	11.3838	NA	n.a.
188095	2mm - 63μm	n.a.	10-20	n.a.	-26.195	0.9705 ± 0.0027	-38± 3	240 ± 25	0.942879	8.78184	NA	n.a.
188092	2mm - 63μm	n.a.	20-50	n.a.	-25.31	0.8658 ± 0.0027	-142± 3	1160 ± 25	0.387456	5.0552	NA	n.a.
188089	2mm - 63μm	n.a.	50-100	n.a.	-23.975	0.5082 ± 0.0029	-496± 3	5435 ± 50	0.227291	3.61497	NA	n.a.
188099	<63μm	n.a.	0-10	n.a.	-27.54	1.0434 ± 0.0031	34± 3	>modern	4.25145	12.2564	NA	n.a.
188096	<63μm	n.a.	10-20	n.a.	-26.055	0.9957 ± 0.003	-13± 3	modern	1.83544	10.4433	NA	n.a.
188093	<63μm	n.a.	20-50	n.a.	-25.44	0.9286 ± 0.0027	-79± 3	595 ± 25	0.848247	7.84147	NA	n.a.
188090	<63μm	n.a.	50-100	n.a.	-23.855	0.6249 ± 0.0027	-380± 3	3775 ± 35	0.353264	4.62891	NA	n.a.
190839	rock: >2mm	n.a.	0-10	n.a.	-25.0216	0.5232 ± 0.0016	-481± 2	5205 ± 25	0.191734	6.70141	NA	n.a.
189639	rock: >2mm	n.a.	10-20	n.a.	-25	0.6263 ± 0.0022	-379± 2	3760 ± 30	0.133944	4.61494	NA	n.a.
189640	rock: >2mm	n.a.	20-50	n.a.	-24.3	0.2892 ± 0.0016	-713± 2	9965 ± 45	0.125536	3.93382	NA	n.a.
189641	rock: >2mm	n.a.	50-100	n.a.	-24.7	0.2375 ± 0.0017	-765± 2	11550 ± 60	0.093741	3.50919	NA	n.a.
192063	2mm - 63μm	POC < 1g/mL	0-10	n.a.	n.a.	1.0282 ± 0.0034	19 ± 3	>modern	25.69	n.m.	n.a.	n.a.
192064	2mm - 63μm	POC < 1g/mL	10-20	n.a.	n.a.	1.0038 ± 0.0033	-5 ± 3	modern	25.99	n.m.	n.a.	n.a.
192168	2mm - 63μm	POC < 1g/mL	20-50	n.a.	n.a.	1.0133 ± 0.0027	4 ± 3	modern	n.m.	n.m.	n.a.	n.a.
192169	2mm - 63μm	POC < 1g/mL	50-100	n.a.	n.a.	0.999 ± 0.0027	-10 ± 3	modern	n.m.	n.m.	n.a.	n.a.
192062	2mm - 63μm	POC Free >1g/mL	0-10	n.a.	n.a.	1.0346 ± 0.0034	25 ± 3	>modern	2.08	n.m.	n.a.	n.a.
192047	2mm - 63μm	POC Free >1g/mL	10-20	n.a.	n.a.	0.9734 ± 0.0027	-35 ± 3	215 ± 25	0.77	n.m.	n.a.	n.a.
192048	2mm - 63μm	POC Free >1g/mL	20-50	n.a.	n.a.	0.8584 ± 0.0024	-149 ± 2	1225 ± 25	0.38	n.m.	n.a.	n.a.
192049	2mm - 63μm	POC Free >1g/mL	50-100	n.a.	n.a.	0.494 ± 0.0019	-510 ± 2	5665 ± 35	0.18	n.m.	n.a.	n.a.
188471	<2mm	WEOC	0-10	n.a.	-28.4	1.0225 ± 0.0039	14 ± 4	>Modern	n.a.	n.a.	43275.4	n.a.
188472	<2mm	WEOC	10-20	n.a.	-27.4	1.0334 ± 0.0039	25 ± 4	>Modern	n.a.	n.a.	23734.5	n.a.
188473	<2mm	WEOC	20-50	n.a.	-26.4	1.0318 ± 0.0039	23 ± 4	>Modern	n.a.	n.a.	20436.2	n.a.
188474	<2mm	WEOC	50-100	n.a.	-25	0.9628 ± 0.0043	-46 ± 5	305 ± 40	n.a.	n.a.	6732.87	n.a.
190889	<2mm	TLE	0-10	A	-30.8	0.9984 ± 0.0022	-10± 3	modern	n.a.	n.a.	104.691	n.a.
188684	<2mm	TLE	0-10	B	-31.7	1.053 ± 0.003	44± 3	modern	n.a.	n.a.	172.056	n.a.
190836	<2mm	TLE	10-20	A	-30.7	1.0434 ± 0.0023	34± 3	>modern	n.a.	n.a.	97.6569	n.a.
188686	<2mm	TLE	10-20	B	-30.7	1.0543 ± 0.0035	45± 4	modern	n.a.	n.a.	64.193	n.a.
190837	<2mm	TLE	20-50	A	-29.9	0.8554 ± 0.0018	-152± 2	1255 ± 20	n.a.	n.a.	25.641	n.a.
188688	<2mm	TLE	20-50	B	-30.1	0.9324 ± 0.0027	-76± 3	560 ± 25	n.a.	n.a.	16.7125	n.a.
190840	<2mm	TLE	50-100	A	-30	0.8042 ± 0.0025	-203± 3	1750 ± 25	n.a.	n.a.	7.62074	n.a.
188690	<2mm	TLE	50-100	B	-29.9	0.7933 ± 0.0023	-214± 3	1860 ± 25	n.a.	n.a.	6.79415	n.a.
188685	<63μm	TLE	0-10	A	-31.4	1.0588 ± 0.0031	50 ± 3.1	modern	n.a.	n.a.	274.595	n.a.
189625	<63μm	TLE	0-10	B	-31.3	1.0507 ± 0.003	42 ± 3	>modern	n.a.	n.a.	289.012	n.a.
188687	<63μm	TLE	10-20	A	-30.2	0.9937 ± 0.0029	-15 ± 3	50 ± 25	n.a.	n.a.	41.8323	n.a.
189626	<63μm	TLE	10-20	B	-30.4	1.0096 ± 0.0029	1 ± 2.9	>modern	n.a.	n.a.	85.0811	n.a.
188689	<63μm	TLE	20-50	A	-30.2	0.9687 ± 0.0028	-40± 2.8	255 ± 25	n.a.	n.a.	40.8792	n.a.
189627	<63μm	TLE	20-50	B	-29.8	0.9338 ± 0.0026	-74 ± 3	550 ± 25	n.a.	n.a.	52.0923	n.a.
188691	<63μm	TLE	50-100	A	-29.2	0.8395 ± 0.0033	-168± 4	1405 ± 35	n.a.	n.a.	17.2394	n.a.
189628	<63μm	TLE	50-100	B	-29.6	0.7659 ± 0.0022	-241± 2	2140 ± 25	n.a.	n.a.	43.0222	n.a.
190851	<2mm to >63μm	TLE	0-10	n.a.	-32.6	1.0543 ± 0.0023	45 ± 2.3	>modern	n.a.	n.a.	352.375	n.a.
190845	<2mm to >63μm	TLE	10-20	n.a.	-30.6	1.0022 ± 0.0021	-7 ± 2.1	modern	n.a.	n.a.	131.99	n.a.
190846	<2mm to >63μm	TLE	20-50	n.a.	-30.3	0.9599 ± 0.0021	-49 ± 2.1	330 ± 20	n.a.	n.a.	17.9426	n.a.
190843	<2mm to >63μm	TLE	50-100	n.a.	-29.6	0.7894 ± 0.0017	-218 ± 1.7	1900 ± 20	n.a.	n.a.	12.2997	n.a.
192171	DF (>1.65g/L)	TLE	0-10	n.a.	-30	1.0344 ± 0.0027	25 ± 2.7	>modern	n.a.	n.a.	219.375	n.a.
192172	DF (>1.65g/L)	TLE	10-20	n.a.	-30	0.9767 ± 0.0026	-32 ± 2.6	190 ± 25	n.a.	n.a.	85.659	n.a.
192173	DF (>1.65g/L)	TLE	20-50	n.a.	-30	0.8515 ± 0.0023	-156 ± 2.3	1290 ± 25	n.a.	n.a.	46.4798	n.a.
192174	DF (>1.65g/L)	TLE	50-100	n.a.	-30	0.6185 ± 0.0023	-387 ± 2.3	3860 ± 35	n.a.	n.a.	29.3492	n.a.
190890	<2mm	AA	0-10	A	-26.6	1.0688 ± 0.002	59± 2	>modern	n.a.	n.a.	931.59	n.a.
190887	<2mm	AA	0-10	B	-26.2	1.0577 ± 0.0024	48± 2.4	>modern	n.a.	n.a.	902.379	n.a.
190842	<2mm	AA	10-20	A	-25	1.0531 ± 0.0023	44± 2.3	>modern	n.a.	n.a.	240.856	n.a.
190844	<2mm	AA	10-20	B	-24.3	1.039 ± 0.0023	30± 2.3	>modern	n.a.	n.a.	313.99	n.a.
190992	<2mm	AA	20-50	A	-24.7	0.9739 ± 0.0029	-35± 2.9	210 ± 25	n.a.	n.a.	79.6106	n.a.
190993	<2mm	AA	20-50	B	-24.7	0.9544 ± 0.0029	-54± 2.9	375 ± 25	n.a.	n.a.	80.7974	n.a.
190994	<2mm	AA	50-100	A	-25	0.799 ± 0.0033	-208± 3.3	1800 ± 35	n.a.	n.a.	198.513	n.a.
190995	<2mm	AA	50-100	B	-25	0.8484 ± 0.0035	-159± 3.5	1320 ± 35	n.a.	n.a.	236.989	n.a.
189629	<63μm	AA	0-10	A	-25.5	1.0714 ± 0.003	62± 3	>modern	n.a.	n.a.	1090.12	n.a.
189633	<63μm	AA	0-10	B	-25.7	1.068 ± 0.0031	59± 3.1	>modern	n.a.	n.a.	1791.52	n.a.
189630	<63μm	AA	10-20	A	-24.4	1.024 ± 0.0029	15± 2.9	>modern	n.a.	n.a.	298.856	n.a.
189634	<63μm	AA	10-20	B	-23.8	1.0444 ± 0.0029	35± 2.9	>modern	n.a.	n.a.	723.836	n.a.
189631	<63μm	AA	20-50	A	-24.2	0.9821 ± 0.0026	-26± 2.6	145 ± 25	n.a.	n.a.	257.294	n.a.
189635	<63μm	AA	20-50	B	-22.3	1.0019 ± 0.0028	-7± 2.8	modern	n.a.	n.a.	454.356	n.a.
189632	<63μm	AA	50-100	A	-25	0.9059 ± 0.0032	-102± 3.2	795 ± 30	n.a.	n.a.	75.5147	n.a.
189636	<63μm	AA	50-100	B	-20.8	0.8989 ± 0.0036	-109± 3.6	855 ± 35	n.a.	n.a.	99.9473	n.a.
190885	<2mm	AI	0-10	n.a.	-28.67	1.0037 ± 0.0022	-5± 2	modern	2.64889	21.6174	n.a.	n.a.
190886	<2mm	AI	10-20	n.a.	-26.49	0.944 ± 0.0021	-64± 2	465 ± 20	1.4995	17.1369	n.a.	n.a.
190850	<2mm	AI	20-50	n.a.	-26.6	0.8003 ± 0.0019	-207± 2	1790 ± 20	0.478652	8.52468	n.a.	n.a.
190841	<2mm	AI	50-100	n.a.	-24.3	0.3698 ± 0.0017	-633± 2	7990 ± 40	0.297079	5.42283	n.a.	n.a.
192052	<63μm	AI	0-10	n.a.	-25	1.0263 ± 0.0028	17 ± 2.8	>modern	2.64	n.m.	n.a.	n.a.
192053	<63μm	AI	10-20	n.a.	-25	0.955 ± 0.0026	-53 ± 2.6	370 ± 25	1.17	n.m.	n.a.	n.a.
192054	<63μm	AI	20-50	n.a.	-25	0.8598 ± 0.0024	-148 ± 2.4	1215 ± 25	0.5	n.m.	n.a.	n.a.
192055	<63μm	AI	50-100	n.a.	-25	0.4418 ± 0.0015	-562 ± 1.5	6560 ± 30	0.23	n.m.	n.a.	n.a.
190831	<2mm	Lipid Extracted Residual	0-10	n.a.	-27.7382	0.9615 ± 0.0022	-47± 2	315 ± 20	1.86113	10.7626	n.a.	n.a.
190832	<2mm	Lipid Extracted Residual	10-20	n.a.	-24.9357	0.8548 ± 0.0018	-153± 2	1260 ± 20	1.25006	10.8281	n.a.	n.a.
190833	<2mm	Lipid Extracted Residual	20-50	n.a.	-24.3179	0.5953 ± 0.0017	-410± 2	4165 ± 25	0.517806	6.48741	n.a.	n.a.
190834	<2mm	Lipid Extracted Residual	50-100	n.a.	-23.1508	0.3313 ± 0.0017	-672± 2	8875 ± 45	0.25788	4.28173	n.a.	n.a.
188326	<2mm	FLF	0-10	A	-28.0185	1.0114 ± 0.004	2.7± 4	modern	28.5363	26.4415	n.a.	10.4164
188333	<2mm	FLF	0-10	B	-28.1412	1.0174 ± 0.004	8.6± 4	>modern	26.4433	24.1092	n.a.	11.8572
188359	<2mm	FLF	0-10	C	-28.4256	1.0159 ± 0.0042	7± 4.2	>modern	25.6164	22.3856	n.a.	11.4505
188329	<2mm	oLF	0-10	A	-27.2177	1.0354 ± 0.004	26.4± 4	>modern	41.2633	24.9221	n.a.	13.1907
188335	<2mm	oLF	0-10	B	-27.3409	1.021± 0.004	12.1± 4	>modern	15.4118	21.2456	n.a.	9.2499
188341	<2mm	oLF	0-10	C	-27.5548	1.0304 ± 0.0041	21.4± 4.1	>modern	41.4586	22.5547	n.a.	14.5284
188352	<2mm	DF	0-10	A	-27.3083	1.0267 ± 0.0044	17.7± 4.4	>modern	1.77911	9.68791	n.a.	76.3929
188339	<2mm	DF	0-10	B	-27.2937	1.0252 ± 0.004	16.4± 4	>modern	1.80397	9.67539	n.a.	78.8929
188345	<2mm	DF	0-10	C	-27.4357	1.0249 ± 0.0041	16± 4.1	>modern	1.85933	9.6156	n.a.	74.0211
188327	<2mm	FLF	10-20	A	-26.5021	0.8548 ± 0.0034	-152.6± 3.4	1260 ± 35	28.0491	34.7758	n.a.	9.49031
188334	<2mm	FLF	10-20	B	-26.6216	1.0026 ± 0.004	-6.1± 4	modern	23.2	30.4273	n.a.	11.507
188360	<2mm	FLF	10-20	C	-26.7484	0.9929 ± 0.004	-15.7± 4	modern	25.9305	34.9351	n.a.	10.7913
188330	<2mm	oLF	10-20	A	-26.5459	0.9752 ± 0.0038	-33.3± 3.8	200 ± 35	40.1248	33.0639	n.a.	12.9237
188336	<2mm	oLF	10-20	B	-26.4823	0.9679 ± 0.0038	-40.5± 3.8	260 ± 35	41.3896	33.64	n.a.	15.541
188342	<2mm	oLF	10-20	C	-26.4881	0.9723 ± 0.0039	-36.1± 3.9	225 ± 35	42.4967	34.2788	n.a.	15.3153
188353	<2mm	DF	10-20	A	-25.9348	0.9759 ± 0.0041	-32.5± 4.1	195 ± 35	1.02574	8.44098	n.a.	77.586
188357	<2mm	DF	10-20	B	-25.9335	0.965 ± 0.0041	-43.4± 4.1	285 ± 35	0.806347	7.52751	n.a.	72.9521
188363	<2mm	DF	10-20	C	-25.961	0.9814 ± 0.004	-27.1 ± 4.0	150 ± 35	0.951361	8.21031	n.a.	73.8933
188328	<2mm	FLF	20-50	A	-27.0829	0.9337 ± 0.0037	-74.4 ± 3.7	550 ± 35	28.9209	32.3862	n.a.	4.52558
188356	<2mm	FLF	20-50	B	-26.7116	0.9437 ± 0.0039	-64.5 ± 3.9	465 ± 35	25.5655	31.1919	n.a.	6.48955
188361	<2mm	FLF	20-50	C	-26.7662	0.9388 ± 0.0039	-69.3 ± 3.9	505 ± 35	26.7181	32.7086	n.a.	7.45418
188331	<2mm	oLF	20-50	A	-26.5168	1.0043 ± 0.0039	-4.4 ± 3.9	modern	43.6671	41.6855	n.a.	11.993
188337	<2mm	oLF	20-50	B	-26.3083	0.8716 ± 0.0034	-135.9± 3.4	1105 ± 35	34.8983	39.5651	n.a.	12.3573
188343	<2mm	oLF	20-50	C	-26.3527	0.8694 ± 0.0034	-138.1± 3.4	1125 ± 35	36.982	40.963	n.a.	12.6709
188354	<2mm	DF	20-50	A	-25.1207	0.8406 ± 0.0037	-167 ± 3.7	1395 ± 40	0.478793	5.7463	n.a.	83.4814
188340	<2mm	DF	20-50	B	-25.0698	0.8713 ± 0.0035	-136 ± 3.5	1105 ± 35	0.46055	6.12408	n.a.	81.1532
188364	<2mm	DF	20-50	C	-25.2011	0.8827 ± 0.0037	-125 ± 3.7	1005 ± 35	0.51274	5.76806	n.a.	79.8749
188445	<2mm	FLF	50-100	A	-26.3214	0.6273 ± 0.0022	-378.1± 2.2	3745 ± 30	23.5272	nm	n.a.	3.10889
188446	<2mm	FLF	50-100	B	-26.1077	0.7791 ± 0.0042	-227.6± 4.2	2005 ± 45	28.734	nm	n.a.	3.86132
188362	<2mm	FLF	50-100	C	-25.5665	0.562 ± 0.0025	-442.9± 2.5	4630 ± 40	26.5483	48.8435	n.a.	17.1377
188332	<2mm	oLF	50-100	A	-24.5562	0.3605 ± 0.0019	-643 ± 1.9	8195 ± 45	46.6691	69.8912	n.a.	5.1915
188338	<2mm	oLF	50-100	B	-24.6815	0.3548 ± 0.0019	-648 ± 1.9	8325 ± 45	38.9466	64.7459	n.a.	8.87111
188344	<2mm	oLF	50-100	C	-24.7853	0.394 ± 0.002	-609 ± 2	7480 ± 45	43.8369	nm	n.a.	9.9039
188355	<2mm	DF	50-100	A	-24.1346	0.4504 ± 0.0027	-553.5± 2.7	6405 ± 50	0.228675	3.75234	n.a.	91.6996
188358	<2mm	DF	50-100	B	-23.7651	0.4321 ± 0.0027	-571.7± 2.7	6740 ± 60	0.213936	3.36346	n.a.	87.2676
188365	<2mm	DF	50-100	C	-23.9121	0.4378 ± 0.0027	-566± 2.7	6635 ± 50	0.217212	3.62038	n.a.	72.9584

## Sheet: SI Table S2
Type	Extraction	CAMS ID	Measured Mass (μg)	F14C ± err
Dead	TLE	189955	0.27013	0.0328± 0.0003
Dead	TLE	189956	0.353247	0.0139± 0.0002
Dead	TLE	189957	0.553247	0.0323± 0.0003
Dead	TLE	189958	0.550649	0.0082± 0.0001
Dead	TLE	190896	0.550649	0.0145± 0.0002
Dead	TLE	190895	0.971429	0.0092± 0.0001
Dead	TLE	190828	1.2	0.0067± 0.0001
Dead	TLE	190827	0.488312	0.0184± 0.0002
Modern	TLE	189959	0.636364	1.4936± 0.0055
Modern	TLE	189960	0.657143	1.4948± 0.0061
Modern	TLE	189961	0.316883	1.4847± 0.0052
Modern	TLE	189962	0.306494	1.4758± 0.0051
Modern	TLE	190830	0.953247	1.4712± 0.0034
Modern	TLE	190829	0.825974	1.4635± 0.0029
dead	AA	190899	0.579221	0.0833± 0.0004
modern	AA - Protien Powder	190900	0.937662	1.0204± 0.0023
dead	AA	189963	0.753247	0.0250± 0.0004
dead	AA	189964	0.21039	0.1161± 0.0004
dead	AA	189945	0.0675325	0.1600± 0.0007
modern	AA - ANU	189946	0.509091	1.5170± 0.0297
modern	AA - ANU	189947	0.314286	1.4997± 0.0287
modern	AA - ANU	189948	0.187013	1.4384± 0.025
Modern	comerical protien powder	190531	1.16623	1.0262± 0.0042
Modern	comerical protien powder	190532	0.662338	1.0364± 0.0045
Modern	comerical protien powder	190533	0.766234	1.0689± 0.0046

## Sheet: SI Table S3
Table 3: Linear regression fits for the y = mx+ b where x is the independent variable and y is the depended variable and are listed in the table. Correlations are run between the data sets to measure the response of each parameter.
	x value	y value		Coefficient ± SE	p-value	r2
	<2mm	WEOC <2mm	Slope	0.14 ± 0.04	0.0618694	0.880089
		TLE <2mm	Slope	0.48 ± 0.14	0.078847	0.848523
		AA <2mm	Slope	0.48 ± 0.05	0.0111447	0.977835
		AI <2mm	Slope	1.26 ± 0.03	0.00068698	0.998627
	<63μm	AI <63μm	Slope	1.38 ± 0.02	0.00012131	0.999757
		TLE <63μm	Slope	0.57 ± 0.06	0.012187	0.975775
		AA <63μm	Slope	0.37 ± 0.06	0.02139	0.957678
	x value	y value		Coefficient ± SE	p-value	r2
	Depth	<2mm	Slope	-7.2 ± 0.74	0.0104624	0.979185
		2mm to 63μm	Slope	-7.49 ± 0.63	0.00708923	0.985872
		<63μm	Slope	-5.97 ± 0.71	0.014032	0.972133
		Rocks	Slope	-5.01 ± 2.27	0.158108	0.708783
		WEOC <2mm	Slope	-0.98 ± 0.37	0.118836	0.776449
		TLE <2mm	Slope	-3.58± 0.59	0.000872316	0.861759
		AA <2mm	Slope	-3.49± 0.23	5.7265e-06	0.973723
		AI <2mm	Slope	-9.1 ± 0.73	0.00636075	0.987319
		TLE <63μm	Slope	-3.47± 0.34	4.77556e-05	0.946898
		AA <63μm	Slope	-2.3± 0.13	1.98258e-06	0.981531
		AI <63μm	Slope	-8.28 ± 0.91	0.0119831	0.976177
		FLF	Slope	-4.93± 0.78	8.97239e-05	0.79847
		OLF	Slope	-9.41± 0.9	1.0245e-06	0.91668
		DF	Slope	-8.41± 0.45	3.78927e-09	0.972679
		POC	Slope	-0.29± 0.2	0.288167	0.506707
		POC Free: 2mm to 63μm	Slope	-7.7± 0.59	0.0058493	0.988336
		TLE: 2mm to 63μm	Slope	-3.61± 0.3	0.00684165	0.986364
		TLE DF	Slope	-5.9± 0.06	0.000107271	0.999785
	x value	y value		Coefficient ± SE	p-value	r2
	<2mm	TLE: <2mm	Slope	0.48 ± 0.14	0.078847	0.848523
		TLE: 2mm to 63μm	Slope	0.5 ± 0.04	0.00552615	0.988978
		TLE: DF >1.65 g/ml	Slope	0.8 ± 0.09	0.0123465	0.975459
		TLE: <63μm	Slope	0.47 ± 0.05	0.0104224	0.979
	<2mm	<63μm	Slope	0.83 ± 0.02	0.000373461	0.999253
		2mm to 63μm	Slope	1.04 ± 0.02	0.000391502	0.999217
	<2mm TLE	<63μm TLE	Slope	0.86 ± 0.25	0.0740618	0.857362
	<2mm AA	<63μm AA	Slope	0.65 ± 0.06	0.00952733	0.981036

## Sheet: SI Table S4
Table S2: Normalized relative peak areas from solid state 13C- NMR analysis of 4 depth intervals collected from an annual grassland (“Buck” site) at the Hopland Research and Extension Center (HREC) in Hopland CA.
		C=O groups	Aromatic C-O groups	Other aromatics and olefinics	O- and N-alkyl groups	Alkyl carbon groups
Sample Depth	Peak Range	210-165 ppm	165-145 ppm	145-95 ppm	95-52 ppm	52-0 ppm
0-10 cm		0.38	0.34	0.14	0.03	0.11
10-20 cm		0.4	0.27	0.17	0.04	0.12
20-50 cm		0.31	0.22	0.24	0.05	0.18
50-100 cm*		-	-	-	-	-
*Not enough signal to report values.
