# Supplementary material for: Diverse organic carbon dynamics captured by radiocarbon analysis of distinct compound classes in a grassland soil
Source: Copernicus journal article supplement (doi:10.5194/egusphere-2023-3125), 2024-01-08
Supplement: Supplementary file 3 [file egusphere-2023-3125-supplement.zip]

Archive with 2 entries (2 files):
- KEG_Biogeosciences_MS_SI_vf.pdf
- KEG_HREC_CC_14C_SI_tables_BIOGEO.xlsx
