# Supplementary material for: Diverse organic carbon dynamics captured by radiocarbon analysis of distinct compound classes in a grassland soil
Source: Copernicus journal article supplement (doi:10.5194/egusphere-2023-3125), 2024-01-08
Supplement: Supplementary file [file egusphere-2023-3125-RC1-supplement.pdf]

# Diverse organic carbon dynamics captured by radiocarbon analysis of distinct compound classes in a grassland soil

Katherine E. Grant<sup>1\*</sup>, Marisa N. Repasch<sup>1,2,3</sup>, Kari M. Finstad<sup>1</sup>, Julia D. Kerr<sup>1</sup>, Maxwell Marple<sup>1</sup>, Christopher J. Larson<sup>1,4</sup>, Taylor A. B. Broek<sup>1,5</sup>, Jennifer Pett-Ridge<sup>1,6</sup>, and Karis J. McFarlane<sup>1</sup>

<sup>1</sup>Physical and Life Sciences Directorate, Lawrence Livermore National Laboratory, Livermore, CA 94550, USA

<sup>2</sup>Institute of Arctic and Alpine Research, University of Colorado, Boulder, CO, USA

<sup>3</sup>Earth and Planetary Sciences, University of New Mexico, Albuquerque, NM, USA

<sup>4</sup>Department of Earth and Environmental Science, University of Pennsylvania, Philadelphia, PA, USA

<sup>5</sup>National Ocean Sciences Accelerator Mass Spectrometry (NOSAMS) Facility, Woods Hole Oceanographic Institution Woods Hole, MA, USA

<sup>6</sup>Life and Environmental Sciences Department, University of California-Merced, Merced, CA, USA

*Correspondence to:* Katherine E. Grant (grant39@llnl.gov)

**Abstract.** Soil organic carbon (SOC) is a large, dynamic reservoir composed of a complex mixture of plant and microbe derived compounds with a wide distribution of cycling timescales and mechanisms. The distinct residence times of individual C components within this reservoir depend on a combination of factors, including compound reactivity, mineral association, and climate conditions. To better constrain SOC dynamics, bulk radiocarbon measurements are commonly used to trace biosphere inputs into soils and estimate timescales of SOC cycling. However, understanding the mechanisms driving the persistence of organic compounds in bulk soil requires analyses of SOC pools that can be linked to plant sources and microbial transformation processes. Here, we adapt approaches, previously developed for marine sediments, to isolate organic compound classes from soils for radiocarbon (<sup>14</sup>C) analysis. We apply these methods to a soil profile from an annual grassland in Hopland, California (USA) to assess changes in SOC persistence with depth to 1 m. We measured the radiocarbon values of water extractable organic carbon (WEOC), total lipid extracts (TLE), total hydrolysable amino acids (AA), and an acid-insoluble (AI) fraction from bulk and physically separated size fractions (<2 mm, 2 mm–63 μm, and <63 μm). Our results show that Δ<sup>14</sup>C values of bulk soil, size fractions, and extracted compound classes became more depleted with depth, and individual SOC components have distinct age-depth distributions that suggest distinguishable cycling rates. We found that AA and TLE cycle faster than the bulk soils and the AI fraction. The AI was the most <sup>14</sup>C depleted fraction, indicating it is the most chemically inert in this soil. Our approach enables the isolation and measurement of SOC fractions that separate functionally distinct SOC pools that can cycle relatively quickly (e.g., plant and microbial residues) from more passive or inert SOC pools (associated with minerals or petrogenic) from bulk soils and soil physical fractions. With the effort to move beyond SOC bulk analysis, we find that compound class <sup>14</sup>C analysis can improve our understanding of SOC cycling and disentangle the physical and chemical factors driving OC cycling rates and persistence.

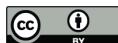

## 34 1 Introduction

35 Soil organic carbon (SOC) is a large and complex terrestrial reservoir of Earth's organic carbon (OC) (Jobbágy and  
36 Jackson, 2000). It is a highly dynamic and open pool with inputs from decaying plant material, living roots, and soil microbes,  
37 and with losses driven by microbial activity that includes the degradation and transformation of compounds (Angst et al.,  
38 2021). The results of these processes is a heterogenous mixture of organic compounds with different radiocarbon ( $^{14}\text{C}$ ) ages  
39 and reactivities (Lehmann and Kleber, 2015; Shi et al., 2020; Trumbore and Harden, 1997; Gaudinski et al., 2000; Mcfarlane  
40 et al., 2013). This complexity obscures the mechanisms that control overall OC persistence in soils, resulting in a continued  
41 debate over the degree to which environmental factors, physical protection, and chemical composition influence SOC reactivity  
42 and persistence (Lützow et al., 2006; Lehmann et al., 2020; Schmidt et al., 2011).

43 Bulk analysis methods have not fully demonstrated how physical protection and chemical composition interact to  
44 influence SOC persistence, and so novel organic matter characterization methods are necessary to shed light on how different  
45 compound classes of OC are preserved in soils and through what mechanisms. For example, we need to understand how the  
46 chemical structure of OC influences interactions with mineral surfaces, such as aggregation or sorption, as well as how the  
47 environment influences the decomposition and resource availability of certain OC compounds and functional groups.  
48 However, it has been difficult to isolate, identify, and quantify pools of OC that directly link to in-situ OC chemical compounds  
49 (Von Lutzow et al., 2007). Therefore, multiple approaches are needed to fully understand the interplay between chemical  
50 compound persistence and mineral interaction functions in soil.

51 One approach used to investigate the controls on SOC persistence is to separate soil into operationally defined carbon  
52 pools (e.g., size or density fractions) and characterize the resulting fractions. This approach has demonstrated that association  
53 of OC with soil minerals is a critical mechanism for C stabilization (Vogel et al., 2014; Mikutta et al., 2007), as  $^{14}\text{C}$  data  
54 indicate that some mineral-associated C can persist for thousands of years (Torn et al., 2009). However,  $^{13}\text{C}$  labelling  
55 experiments show that some mineral-associated C cycles quickly, within months to years (Keiluweit et al., 2015; De Troyer  
56 et al., 2011). Likely, some biomolecules form strong associations with mineral surfaces, such as long-chain lipids with iron  
57 oxides (Grant et al., 2022), while other compounds only loosely associate with minerals (e.g., through hydrophobic interactions  
58 with other OC compounds) (Kleber et al., 2007). Therefore, mineral-associated OC isolated using soil physical fractionation  
59 methods remains a heterogenous mixture of OC molecules that have a distribution of turnover times, rather than a homogenous  
60 and intrinsically stable SOC pool (Stoner et al., 2023; Van Der Voort et al., 2017).

61 Another approach that can yield finer resolution of OC turnover than traditional techniques is to isolate and measure the  
62 isotopic signature of specific compounds (Von Lutzow et al., 2007). In marine and riverine systems, compound specific  
63 radiocarbon analysis (CSRA) has been used monitor the degradation of organic carbon through the marine water column (Loh  
64 et al., 2004), characterize marine particulate OC (Hwang and Druffel, 2003), constrain terrestrial OC burial and export from  
65 river systems (Galy et al., 2015; Galy et al., 2008; Repasch et al., 2021) and determine effect of OC export and burial on  
66 precipitation patterns and climate (Hein et al., 2020; Eglinton et al., 2021). Different types of compounds including plant or



67 microbial lipid biomarkers (Douglas et al., 2018; Huang et al., 1996), amino acids (Bour et al., 2016; Blattmann et al., 2020),  
68 lignin (Feng et al., 2017; Feng et al., 2013), certain carbohydrate compounds (Kuzyakov et al., 2014; Gleixner, 2013), and  
69 pyrogenic carbon (Coppola et al., 2018).  can be isolated and analysed for  $^{14}\text{C}$  leading to a more detailed understanding of the  
70 cycling of targeted compounds in the environment. Each of these specific compounds can provide information related to the  
71 persistence and/or source of the OC in soils. For instance, lipids are found in plant cell walls and microbial cell membranes  
72 and used for energy storage. Amino acids are necessary for protein formation and enriched in nitrogen (N) relative to other  
73 plant and microbial residues. These two compound classes not only have diverse chemical reactivities which allows for insight  
74 into chemical compound persistence. Understanding the abundance and age of these two biomarkers in soils can help  
75 differentiate the source of C used by soil microbes for metabolism and growth (e.g., new C inputs vs older, recycled soil C) as  
76 well as the transformation pathways that yield persistent SOC.

77 Recently, CSRA approaches developed for these environments have been applied to soil showing promise for identifying  
78 distinct ages of plant and microbial biomarkers in SOC (Gies et al., 2021; Grant et al., 2022; Van Der Voort et al., 2017; Jia  
79 et al., 2023; Douglas et al., 2018). Most of these CSRA studies applied to SOC have targeted specific, individual biomarkers  
80 in soils, which generally contribute less than 5% of the entire carbon pool (Lützow et al., 2006; Kögel-Knabner, 2002). This  
81 approach can be too specific to elucidate wholistic mechanisms for SOC persistence and turnover that pertain to the  
82 majority of SOC. While individual biomarker ages, such as single ages of a particular lipid or single amino acid, can be useful  
83 in some contexts, comprehensive understanding carbon compound class persistence is vital for understanding and modelling  
84 the soil carbon reservoir's vulnerability to degradation.

85 To strike a balance between too specific and too broad, some researchers have characterized broader compound classes  
86 rather than isolating a single biomarker. For example, this  $^{14}\text{C}$ -compound class approach has been applied to marine dissolved  
87 and particulate OC with a range of compounds, such as total lipids and total amino acids, to provide a broader understanding  
88 of OC persistence in oceans (Wang et al., 2006; Wang et al., 1998; Loh et al., 2004). Wang et al. (1998) established a sequential  
89 extraction procedure to analyse  $^{14}\text{C}$  abundance of total lipids, amino acids, carbohydrates, and a residual acid insoluble fraction  
90 from marine POC and sediments. This approach yielded distinct differences in  $^{14}\text{C}$  age and abundance of the amino acids,  
91 lipids, and the acid insoluble fraction in POC from the marine water column and sediment, as well as in coastal versus open  
92 ocean environments. Loh et al. (2004) found the lipid fraction of dissolved OC and POC to be the oldest fraction measured in  
93 both the Atlantic and Pacific oceans, while the acid insoluble fraction was intermediate in age, and the amino acids and  
94 carbohydrates contained a significant contribution of modern carbon. Wang and Druffel (2001) also used this approach and  
95 found that the lipids were the oldest compound class from sediments in the Southern Ocean, but the acid insoluble residue was  
96 very similar in age to the lipid fraction. These studies suggest that compound classes can have independent cycling rates, but  
97 these cycling rates can be influenced by OC environment. 

98 Here, we apply a  $^{14}\text{C}$  compound class approach to soils to more broadly understand SOC turnover mechanisms. We  
99 characterize the distribution and  $^{14}\text{C}$  age of multiple SOC pools with depth in a well-studied Californian grassland, using soil  
100 physical fractionation (Mcfarlane et al., 2013; Poeplau et al., 2018) and modified compound class extraction methods

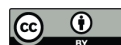

101 previously detailed for marine sediments (Wang et al., 1998). We measured the radiocarbon values of water extractable organic  
102 carbon (WEOC), total lipid extracts (TLE), total hydrolysable amino acids (AA), and an acid-insoluble (AI) fraction from bulk  
103 and physically separated size fractions (bulk soil, sand, and silt+clay). We expected the TLE to be older than its source fraction  
104 (bulk soil, sand, or silt+clay), to be older with depth as the decline in plant inputs necessitates recycling and use of older SOC,  
105 and to be older in the silt+clay fraction as its high surface area should result mineral-OC associations that protect SOC from  
106 soil microbes. We expected the AA to cycle faster than the TLE fraction and the bulk SOC pool based on the young  $^{14}\text{C}$  ages  
107 found for AA extracted from in marine sediments (Wang et al., 1998; Wang and Druffel, 2001), but hypothesized that recycling  
108 of amino acids at depth by soil microbes might result in an increase in the age of AA below 50 cm. Finally, we expected AI to  
109 have old C, similar to the TLE, as seen found in marine sediments (Wang et al., 1998). Here, we describe the relative abundance  
110 and radiocarbon content of total lipid and amino acid compound class extracts and compare carbon storage and cycling rates  
111 within physical soil size fractions. These data provide a foundation for the continued application of compound class  $^{14}\text{C}$  work  
112 to the understanding and modelling of soil OC persistence.

## 113 **2 Materials and Methods**

### 114 **2.1 Site and Sample Description**

115 Soil samples were collected from the University of California's Hopland Research and Extension Center (HREC) in January  
116 2022. The site is an annual grassland with a Mediterranean-type climate; mean annual precipitation (MAP) averages 940 mm  
117 per year and the mean annual temperature is  $15^{\circ}\text{C}$  (Nuccio et al., 2016). The underlying geology consists of mixed sedimentary  
118 rock of the Franciscan formation. The soils are designated Typic Haploxeralfs of the Witherall-Squawrock complex (Soil  
119 Survey Staff, 2020). The samples were collected from the "Buck" site ( $39.001^{\circ}$ ,  $-123.069^{\circ}$ ) where the vegetation is dominated  
120 by annual wild oat grass, *Avena barbata* (Kotanen, 2004; Bartolome et al., 2007). Soils were collected from a freshly dug soil  
121 pit at four depths: 0–10 cm, 10–20 cm, 20–50 cm, and 50–100 cm. Samples were stored in sealed plastic bags at ambient  
122 temperature and transported to the laboratory in Livermore, CA. Soil samples were air dried, homogenized, and sieved to 2  
123 mm, with the  $>2$  mm fraction retained for further analysis. Samples were subdivided for soil characterization, physical size  
124 separations, chemical compound extractions, and density fractionation.

### 125 **2.2 Physical Fractionation**

126 To compare compound classes between mineral-associated OC and mineral-free OC, we used a salt-free and chemical-free  
127 method for isolating the mineral-associated organic matter from the free particulate organic matter (Fig. 1a). Under the  
128 assumption that mineral-associated carbon is primarily found in the silt+clay ( $<63\ \mu\text{m}$ ) particle size fraction, we used a size  
129 fractionation sieving method where air-dried samples were dry-sieved into three size fractions: bulk soil ( $<2$  mm), sand (2 mm  
130 -  $63\ \mu\text{m}$ ), and silt+clay ( $<63\ \mu\text{m}$ ) (Lavallee et al., 2020; Poeplau et al., 2018). Additionally, because the majority of free  
131 particulate organic carbon (POC) is contained in the sand fraction, we used a "water density" separation to remove the low



132 density POC from the mineral matter in this fraction, resulting in a POC ( $<1\text{g mL}^{-1}$ ) fraction and a POC-free ( $>1\text{g mL}^{-1}$ ) sand  
 133 fraction.

134 To further characterize these soils and aid in interpretation of our data, we compared the size fractionated samples to samples  
 135 separated by density using sodium polytungstate (SPT-0 adjusted to a density of  $1.65\text{ g mL}^{-1}$ ) (Poehlau et al., 2018) (see SI  
 136 Section 1.1 for detailed methods). We chose to focus our compound class extraction efforts on size fractionated samples to  
 137 avoid chemical alteration of SOC during exposure to SPT.

138 To constrain any contributions of parent materials to SOC, we processed and analyzed the rock fraction ( $> 2\text{mm}$ ) (Agnelli et  
 139 al., 2002; Trumbore and Zheng, 1996). Rocks were washed with  $18.2\text{ M}\Omega$  water in an ultrasonic bath to remove surface  
 140 contamination, rinsed with  $1\text{N HCl}$  to remove any additional weathered material loosely adhered to the surface, dried at  $60^\circ\text{C}$ ,  
 141 then manually crushed.

142 A large, representative aliquot ( $\sim 10\text{ g}$ ) of the bulk and each physical fraction were ball milled and measured for total organic  
 143 carbon (TOC, wt %), C/N ratio,  $\delta^{13}\text{C}$  and  $\Delta^{14}\text{C}$  (Section 2.6). In addition, we analyzed the bulk soils at each depth with nuclear  
 144 magnetic resonance ( $^{13}\text{C}$  NMR) to assess the broad structural complexity of the OC in the bulk soil (SI Section 2).  
 145

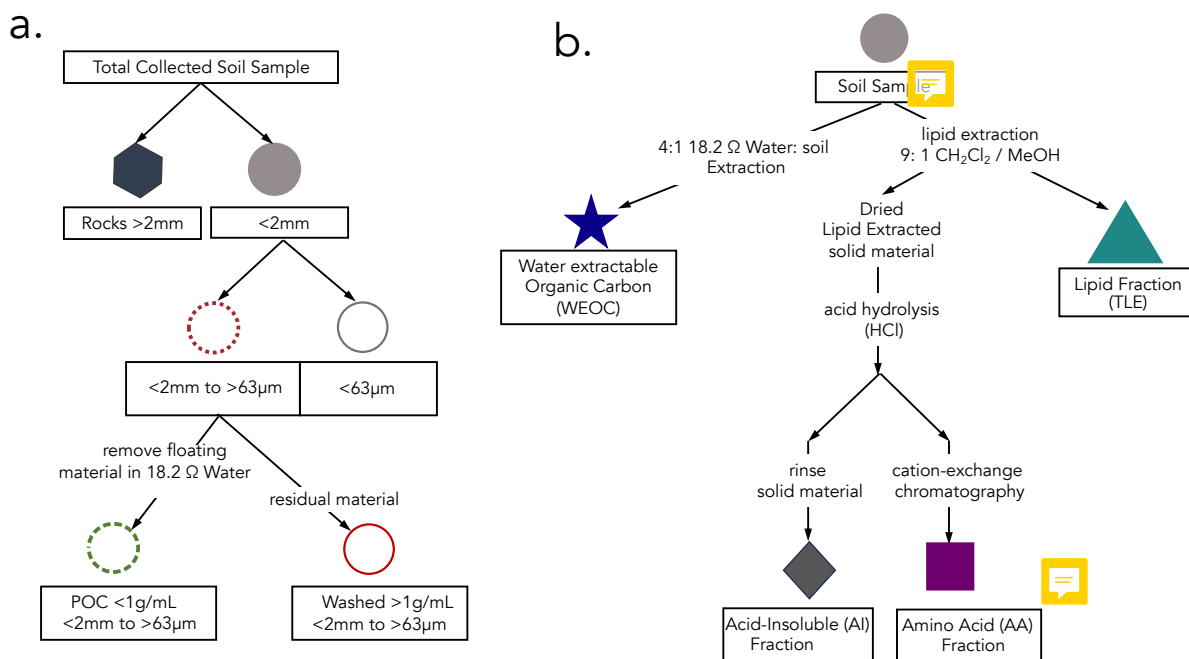

146  
 147 **Figure 1: Schematics of protocols used in this study for a) fractionation by size and b) extraction of targeted compound classes.**  
 148

149 **2.3 Water-extractable organic carbon (WEOC)**



150 The water-extractable organic carbon (WEOC) fraction was collected from 80 g of bulk soil with 18.2 M $\Omega$  water using a 4:1  
151 water to soil ratio (Van Der Voort et al., 2019; Lechleitner et al., 2016; Hagedorn et al., 2004). Saturated soil samples were  
152 shaken for 1 hour and then filtered through a pre-rinsed 0.45  $\mu$ m polyethersulfone (PES) Supor filter under vacuum. An aliquot  
153 was taken for dissolved organic carbon (DOC) measurement on a Shimadzu TOC-L combustion catalytic oxidation instrument.  
154 Sample concentrations were determined using a nine-point DOC calibration curve ranging from 0-200 mgC L<sup>-1</sup>. The WEOC  
155 fraction was dried using a Labconco CentriVap centrifugal drying system at 40°C and subsequently transferred with 0.1N HCl  
156 into pre-combusted quartz tubes to eliminate any inorganic carbon dissolved in the aqueous fraction. The acidified WEOC  
157 fractions were then dried down using the CentriVap. Dried samples were flame sealed under vacuum (Section 2.6) for  
158 subsequent carbon isotope analyses.

159

#### 160 **2.4 Total Lipid Extraction (TLE)**

161 Total lipids (TLE) were extracted from the soil samples using an Accelerated Solvent Extraction (ASE) system (Dionex 350,  
162 Thermo Scientific) in duplicate. The TLE was extracted from the bulk, sand, silt+clay, and the dense fraction (> 1.65 g ml<sup>-1</sup>;  
163 DF). An aliquot of 10–30 g of soil was loaded into an a stainless-steel ASE extraction cell depending on TOC content  
164 (Rehemeyer et al., 2004). The ASE was set to extract the sample for 5 minutes with a holding temperature of 100°C at 1500  
165 PSI. Lipids were extracted using a 9:1 ratio of dichloromethane (DCM or syn: methylene chloride) to methanol (Wang et al.,  
166 1998; Van Der Voort et al., 2017; Grant et al., 2022). The TLE was dried under constant ultra-pure N<sub>2</sub> flow at 40°C using a  
167 nitrogen dryer (Organomation Multivap Nitrogen Evaporator). The TLE was resuspended in ~5ml of 9:1 DCM:Methanol then  
168 transferred to pre-combusted quartz tubes, dried again, and analyzed for <sup>14</sup>C as described below (Section 2.5). Total CO<sub>2</sub>  
169 produced by the combustion of the TLE was measured manometrically on the <sup>14</sup>C vacuum lines during graphitization. Process  
170 blank samples were analyzed with each batch (SI Section 3.1).

171

#### 172 **2.5 Amino Acid (AA) Extraction**

173 Amino acids (AA) were extracted from the lipid-extracted residual bulk and silt+clay size fraction with an acid hydrolysis  
174 procedure, desalted, and isolated with cation exchange chromatography using methods modified from those used in marine  
175 systems (Wang et al., 1998; Ishikawa et al., 2018; Blattmann et al., 2020). Briefly, a 500 mg soil aliquot was hydrolyzed with  
176 6N HCl (ACS grade) under an N<sub>2</sub> atmosphere for 19-24 hours at 110°C. After hydrolysis, amino acids in solution were  
177 separated from the solid acid insoluble (AI) fraction via centrifugation for 5 minutes at 2500 rpm. The AI fraction was  
178 subsequently washed at a minimum three additional times with 0.2N HCl to ensure complete AA recovery. The supernatant  
179 was collected in a single pre-combusted vial and then filtered through a pre-combusted quartz wool fiber plug to remove  
180 extraneous sediment particles. The filtered hydrolysate was dried using a CentriVap at 60°C for 4 hours. The dried supernatant  
181 was redissolved in 1 ml 0.1N HCl and loaded onto a preconditioned resin column (BioRad 50WX8 200-400 mesh resin) to  
182 isolate the AA from other hydrolyzed organic matter and remove excess chloride. Details of the procedure can be found in  
183 Ishikawa et al., 2018. Briefly, once the sample was loaded on the column, it was rinsed with three bed volumes (~6 ml) of 18.2

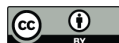

184 M $\Omega$  H<sub>2</sub>O. The free AA were eluted with 10 ml of 2N ammonium hydroxide (NH<sub>4</sub>OH), then transferred into pre-baked quartz  
185 tubes, dried at 60°C in the CentriVap, and finally sealed and combusted for isotopic analysis. The remaining rinsed solid  
186 residual after hydrolysis is the acid-insoluble (AI) fraction. These are processes as a solid sample for isotopic analysis.

187

## 188 **2.6 Isotopic and elemental analysis**

189 All samples were analyzed for radiocarbon (<sup>14</sup>C) at the Center for Accelerator Mass Spectrometry (CAMS) at Lawrence  
190 Livermore National Lab (LLNL) in Livermore, California. Samples were either measured on a 10 MV Van de Graaf FN or  
191 1MV NEC Compact accelerator mass spectrometer (AMS) (Broek et al., 2021), with average errors of F<sup>14</sup>C = 0.0035. For  
192 solid soil analysis, 10 to 250 mg of ground material was weighed into a pre-combusted quartz tubes along with 200 mg CuO  
193 and Ag, flame sealed under vacuum, then combusted at 900°C for 5 hours. The CO<sub>2</sub> was reduced to graphite on preconditioned  
194 iron powder under H<sub>2</sub> at 570°C (Vogel et al., 1984). Measured <sup>14</sup>C values were corrected using  $\delta^{13}\text{C}$  values and are reported  
195 as age-corrected  $\Delta^{14}\text{C}$  values using the following the conventions of Stuiver and Polach (1977). Extraneous C was quantified  
196 for the TLE and AA extractions (SI Table 4 and SI Section 3). For ease of reference, we included conventional radiocarbon  
197 ages in our figures and tables. We quantified turnover times using the single pool turnover model described in Sierra et al.  
198 (2014) and Van Der Voort et al. (2019) and explained in detail in Trumbore (2000) and Torn et al. (2009). This approach  
199 generates two solutions for pools with  $\Delta^{14}\text{C} > 0$  ‰, one corresponding to each side of the atmospheric <sup>14</sup>C-CO<sub>2</sub> curve over the  
200 last 70 years (Hua et al., 2022). Unfortunately, we cannot identify the correct solution (Mcfarlane et al., 2013; Trumbore,  
201 2000), especially for TLE and AA fractions from the top 20 cm, as we do not have multiple time points or additional constraints  
202 such as pool-specific input or decomposition rates. Therefore, our data analysis and interpretations rely on the reported  $\Delta^{14}\text{C}$   
203 values. All individual <sup>14</sup>C measurements used in this study are listed in the Supplementary Information (SI Table 1 and 2).

204 For each solid sample, a dried homogenized aliquot was analyzed for TOC concentration and  $\delta^{13}\text{C}$  using an elemental analyzer  
205 (CHNOS) coupled to an IsoPrime 100 isotope ratio mass spectrometer at the Center for Stable Isotope Biogeochemistry (CSIB)  
206 at the University of California, Berkeley. Samples are assumed to have no inorganic carbon based on acid leaching tests and  
207 previously published <sup>14</sup>C work at this site (Finstad et al, 2023, Foley et al., 2023).  $\delta^{13}\text{C}$  was measured in duplicate for each  
208 solid sample and errors represent the standard deviation of the mean.  $\delta^{13}\text{C}$  values of WEOC, TLE, and AA extracts were  
209 measured on a split of the cryogenically purified CO<sub>2</sub> and were analyzed at the Stable Isotope Geosciences Facility at Texas  
210 A&M University on a Thermo Scientific MAT 253 Dual Inlet Stable Isotope Ratio Mass Spectrometer (SI Table 1).

211

## 212 **2.7 Data analysis**

213 Data was analyzed using MATLAB version R20223 and R v. 3.614 (R Core Team, 2019). Linear regressions were calculated  
214 between the sample depth mid-point and  $\Delta^{14}\text{C}$  values from both the size fractions as well as the extracted compounds (WEOC,  
215 TLE, AA, AI) from the different size fractions. This was done to directly compare the difference in  $\Delta^{14}\text{C}$  value between the  
216 compound classes. Correlation coefficients, p-values and r<sup>2</sup> are provided in SI Table 3. Analysis of Variance (ANOVA) was  
217 used to assess differences in  $\Delta^{14}\text{C}$  with depth, between TLE and AA, and between soil fractions. ANOVA tests were performed



218 in R v. 3.614 (R Core Team, 2019). In the text, results are reported as means followed by one standard error when  $n = 2$  or 3  
219 or by analytical error when  $n = 1$ .

220

### 221 **3 Results**

#### 222 **3.1 Radiocarbon values and characterization of the physical fractions**

223 We used soil size and density fractionation to separate the bulk soil into fractions with different degrees of mineral protection.  
224 Radiocarbon content for the bulk soil, sand, and silt+clay (SI Table S3) became more  $^{14}\text{C}$  depleted (older) with increasing  
225 depth (Table 1, Fig. 2). SOC in the silt+clay was consistently younger than in the bulk soil, with the average difference in  $\Delta^{14}\text{C}$   
226 values increasing from 4‰ at the surface to 87‰ at depth.



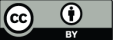

227

228

**Table 1. Carbon concentrations, mass fractions, and radiocarbon values for the size separations from the Buck Pit**

| Depth     | bulk (<2mm) |                                      |               | sand-sized (2mm to 63µm) |                                      |               | POC-free >1g mL <sup>-1</sup> |                                      |               | POC <1 g mL <sup>-1</sup> |                                      |               | silt+clay (<63µm) |                                      |  |
|-----------|-------------|--------------------------------------|---------------|--------------------------|--------------------------------------|---------------|-------------------------------|--------------------------------------|---------------|---------------------------|--------------------------------------|---------------|-------------------|--------------------------------------|--|
|           | %OC         | $\Delta^{14}\text{C} \pm$<br>err (‰) | <i>mass f</i> | %OC                      | $\Delta^{14}\text{C} \pm$<br>err (‰) | <i>mass f</i> | %OC                           | $\Delta^{14}\text{C} \pm$<br>err (‰) | <i>mass f</i> | %OC                       | $\Delta^{14}\text{C} \pm$<br>err (‰) | <i>mass f</i> | %OC               | $\Delta^{14}\text{C} \pm$<br>err (‰) |  |
| 0-10 cm   | 3.14        | 31 ± 3                               | 0.71          | 2.68                     | 25 ± 3                               | 2.08          | 25 ± 3                        | 25.69                                | 19 ± 3        | 0.29                      | 4.25                                 | 34 ± 3        |                   |                                      |  |
| 10-20 cm  | 1.22        | -22 ± 3                              | 0.69          | 0.94                     | -38 ± 3                              | 0.77          | -35 ± 3                       | 25.99                                | -5 ± 3        | 0.31                      | 1.84                                 | -13 ± 3       |                   |                                      |  |
| 20-50 cm  | 0.50        | -116 ± 3                             | 0.75          | 0.39                     | -142 ± 3                             | 0.38          | -149 ± 2                      | n.m.                                 | 4 ± 3         | 0.25                      | 0.85                                 | -79 ± 3       |                   |                                      |  |
| 50-100 cm | 0.25        | -468 ± 3                             | 0.79          | 0.23                     | -496 ± 3                             | 0.18          | -510 ± 2                      | n.m.                                 | -10 ± 3       | 0.21                      | 0.35                                 | -380 ± 3      |                   |                                      |  |

229

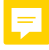

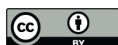

230

231

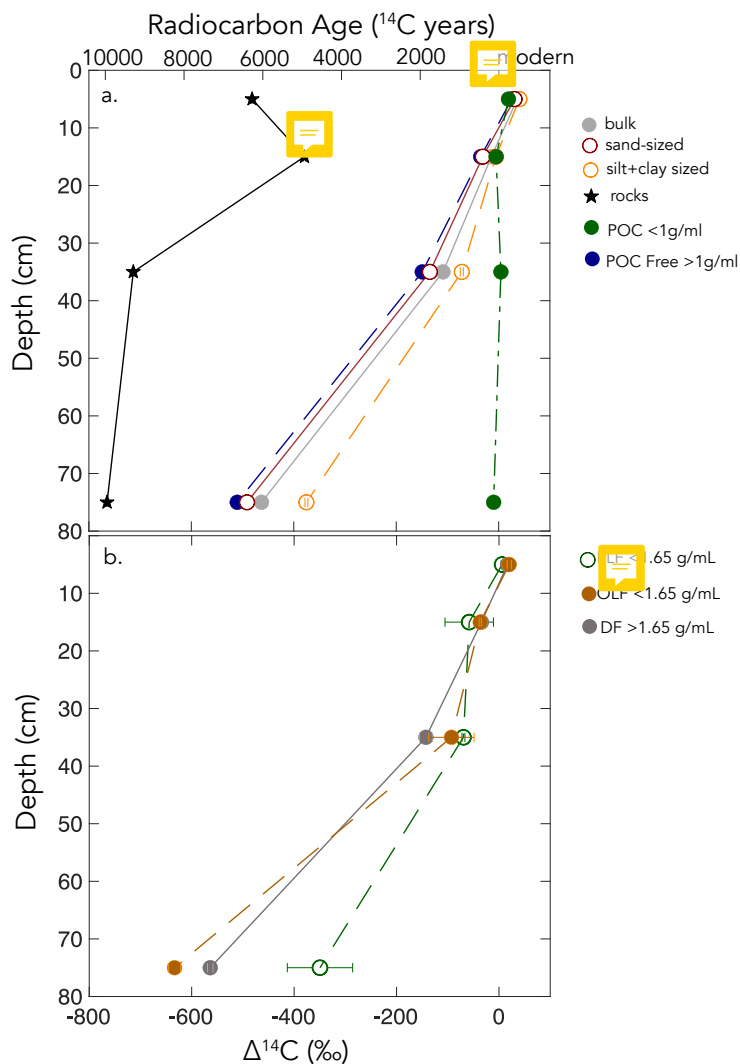

232

233

234

235

**Figure 2:  $\Delta^{14}\text{C}$  values by depth for a) size-fractions and b) density-fractions from the Buck soil pit. Conventional  $^{14}\text{C}$  ages are provided for reference.**

236

237

238

239

240

In the sand fraction, the  $\Delta^{14}\text{C}$  values of POC were consistently near current atmospheric values ( $2 \pm 3\text{‰}$ ) and were not significantly correlated with depth. In contrast, the  $\Delta^{14}\text{C}$  values of the POC-free sand-sized fraction declined with depth ( $+25 \pm 3\text{‰}$  to  $-510 \pm 2\text{‰}$ ,  $p = 0.006$ ) and were indistinguishable from the POC-free sand fraction (Fig. 2). Density fractionation of the bulk soil resulted in most of the sample mass (> 98%) and OC (75–83%) recovered in the DF at all depths (SI Fig. S2).

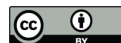

241 **3.2 Compound Class results from bulk soil and silt+clay**

242 In both the bulk soil and silt+clay fraction, the extracted compound classes became  $^{14}\text{C}$ -depleted with depth except for the  
243 WEOC, which had  $^{14}\text{C}$  values that reflected C inputs recently fixed from the atmosphere throughout the soil profile (Fig. 2; SI  
244 tables). The  $\Delta^{14}\text{C}$  values of the WEOC ranged from  $+14 \pm 4\%$  at the surface to  $-46 \pm 4\%$  at depth, and the DOC concentrations  
245 ranged from  $43.2$  to  $6.7 \text{ mg C g soil}^{-1}$  at the surface and at depth, respectively.

246 The TLE from the bulk soil had  $\Delta^{14}\text{C}$  values that range from  $17 \pm 27$  to  $-208 \pm 6\%$  ( $n = 2$ ;  $\pm$  SE) in the surface and  
247 deepest sample, respectively. In comparison, the TLE from the silt+clay fraction was modern at the surface and became more  
248  $^{14}\text{C}$  depleted with depth ( $p < 0.001$ ), from  $+46 \pm 4$  to  $-204 \pm 36 \%$ . The slopes of the linear regressions of  $\Delta^{14}\text{C}$  with depth  
249 were indistinguishable in TLE from the bulk soil and silt+clay. In addition, the TLE from the bulk TLE and silt+clay fraction  
250 TLE (SI Tables) had very similar  $\Delta^{14}\text{C}$  values, but the bulk soil had less lipid-C extracted during each experiment ( $280 \mu\text{g g}$   
251  $\text{C}^{-1}$  in the 0-10 cm vs.  $150 \mu\text{g g C}^{-1}$ ; SI Table 2).

252 The  $\Delta^{14}\text{C}$  values of the AA extracted from the bulk soil ranged from  $54 \pm 5$  to  $-183 \pm 24$  ( $n = 2$ , SE) with depth (Fig.  
253 3, SI Table S3). Similarly, the  $\Delta^{14}\text{C}$  value of the AA fraction extracted from silt+clay declined with depth from  $+60 \pm 3\%$  ( $n$   
254  $= 2$ , SE) at the surface to  $-106 \pm 4 \%$  ( $n = 2$ , SE) at 50-100 cm depth. The slopes of the AA extracted from the bulk and  
255 silt+clay-size fractions were statistically different, indicating that the AA extracted from the bulk soil became more depleted  
256 with depth than that extracted from the silt+clay (SI Table S3). Furthermore, AA fractions were enriched in  $^{14}\text{C}$  values relative  
257 to the TLE or AI fraction ( $p < 0.01$  for bulk soil and  $p < 0.05$  for silt+clay).

258 The AI fraction was the oldest fraction found in our study at each depth. The  $\Delta^{14}\text{C}$  values of the AI fraction ranged  
259 from  $-5 \pm 2\%$  to  $-633 \pm 2\%$  (analytical error,  $n=1$ ) and declined with depth ( $p < 0.01$  for bulk soil and silt+clay; Fig. 3; SI Table  
260 S3).

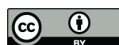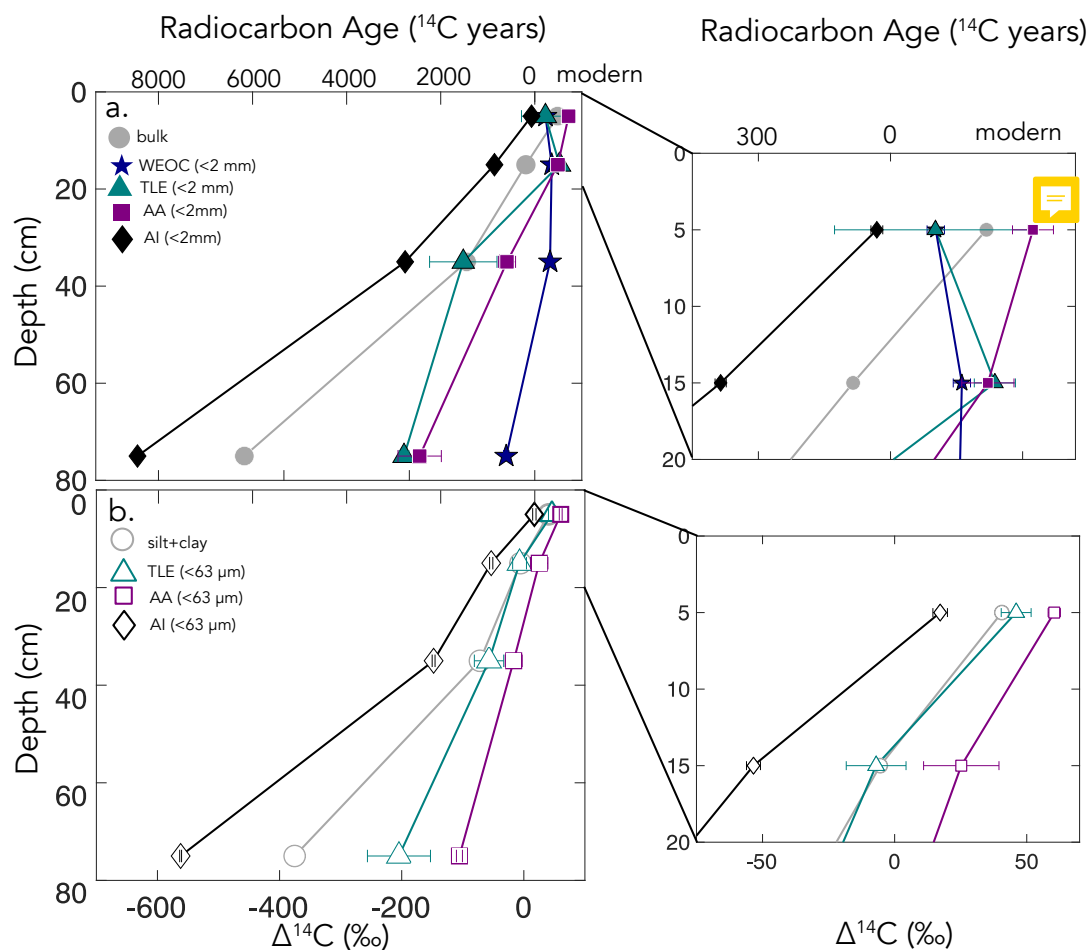

261

262

**Figure 3:  $\Delta^{14}\text{C}$  by depth for a) bulk soil and four compound class fractions extracted from bulk soil for the entire depth profile with the inset of the top 20 cm and b) the silt+clay ( $<63\ \mu\text{m}$ ) fraction and three compound classes extracted from the silt+clay for the entire depth profile with the inset of the top 20 cm. For TLE and AA fractions ( $n=2$ ) and error bars represent the standard error from duplicate measurements. For the  $<2\text{mm}$ , WEOC, and AI fractions ( $n=1$ ) and error bars represent analytical error. Error bars are smaller than the marker width where not shown.**

263

264

265

266

267

268

269

## 4 Discussion

270

### 4.1 Variability of compound classes in bulk soils and fractions

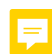

271

We measured radiocarbon content of four distinct soil chemical extracts: water extractable organic carbon (WEOC), total lipid extract (TLE), free amino acids (AA), and the acid insoluble fraction (AI), which had distinct  $\Delta^{14}\text{C}$  values compared to the initial soil fraction each was extracted from (bulk or silt+clay; Fig. 4a and 4b). As expected,  $\Delta^{14}\text{C}$  values of TLE, AA, and AI became more depleted with depth (Fig. 2). More interestingly, the differences between the  $^{14}\text{C}$  content of bulk soil and the extracted compounds were not consistent with depth (Fig. 4). This divergence in  $\Delta^{14}\text{C}$  values reflects differences in turnover

272

273

274

275



276 times among compound classes, which can be influenced by the sources of OC to each of these pools and by differences in the  
277 stabilization mechanisms protecting those compounds from decay. In this annual grassland, plant inputs should have a greater  
278 influence on SOC pools near the surface, which we confirmed with near modern  $\Delta^{14}\text{C}$  signatures in the 0-10 cm depth for all  
279 compound classes and size-fractions (Fig. 3b and 3c). However, at deeper depths, new vegetation inputs should be less readily  
280 available, which results in more depleted  $\Delta^{14}\text{C}$  signatures at depth and could necessitate microbial use and recycling of older  
281 SOC.

282 We found that, averaged across depths, the  $\Delta^{14}\text{C}$  values of the TLE were more depleted than those of the AA, though both  
283 compound classes were more enriched in  $\Delta^{14}\text{C}$  than the bulk soil or silt+clay at they were extracted from. AAs are the  
284 precursors of proteins and found in both plant and microbial biomass. The extracted AAs are hydrolysed proteins can be from  
285 both plant material or microbial biomass within the soil sample (Blattmann et al., 2020), so our measurements likely reflect a  
286 combination of both plant- and microbially-derived AAs. As in marine studies, we found the AAs to be the youngest compound  
287 class fraction (of the TLE and AI) in these soils. The AA pool likely reflects a more actively cycling microbial pool especially  
288 at depth, as AA are enriched in nitrogen compounds and likely microbes are both mining and recycling these compounds  
289 (Moe, 2013). The divergence from bulk  $^{14}\text{C}$  values indicate that even at depth in the soil, the AAs are either continuously  
290 replenished from transport of AAs from surface horizons or re-synthesized with relatively  $^{14}\text{C}$  enriched sources such as the  
291 WEOC.

292 Based on published data for both soils and marine sediments, we expected the TLE to be older than both the AAs and the  
293 bulk soil, however we found that all TLE samples, no matter what fraction we measured, were more  $^{14}\text{C}$  enriched than the bulk  
294 soil. TLE is composed of a continuum of lipids from plant and microbial materials, ranging from leaf waxes to microbial cell  
295 structural components (Angst et al., 2021; Angst et al., 2016), that cycle at different rates and likely interact with mineral  
296 surfaces. Previous studies where individual lipid biomarker  $\Delta^{14}\text{C}$  values were measured in soils on either short chain or long  
297 chain fatty acids found that there is a divergence in  $\Delta^{14}\text{C}$  values between these two pools, with short chain lipids generally  
298 having enriched  $^{14}\text{C}$  values and long chain lipids having more depleted  $^{14}\text{C}$  values (Grant et al., 2022; Van Der Voort et al.,  
299 2017). For example, long-chain lipid biomarkers, primarily thought to be plant derived, had consistently older  $^{14}\text{C}$  ages than  
300 bulk soil (Van Der Voort et al., 2017). Short-chain lipids, which can be microbial or root derived (Rethemeyer et al., 2004),  
301 were found to be younger than long-chain lipids throughout the soil profiles and younger than bulk soil at depth (Van Der  
302 Voort et al., 2017). However, microbial cell wall lipid biomarkers (glycerol dialkyl glycerol tetraethers, GDGTs) had older  
303  $^{14}\text{C}$  ages than bulk soils (Gies et al., 2021). With this consideration, our result of more enriched  $^{14}\text{C}$  of the TLE could be an  
304 indication of a predominance of short chain lipids and suggested higher abundance of microbially-derived lipids than plant-  
305 derived lipids. However further study of specific lipid abundance (e.g., *n*-alkanes, fatty acids) in these soils are necessary, as  
306 it is unclear to what degree lipids are older than bulk soils with depth because of preservation of these compounds through  
307 mineral association or because of microbial use of aged OC sources for growth.

308

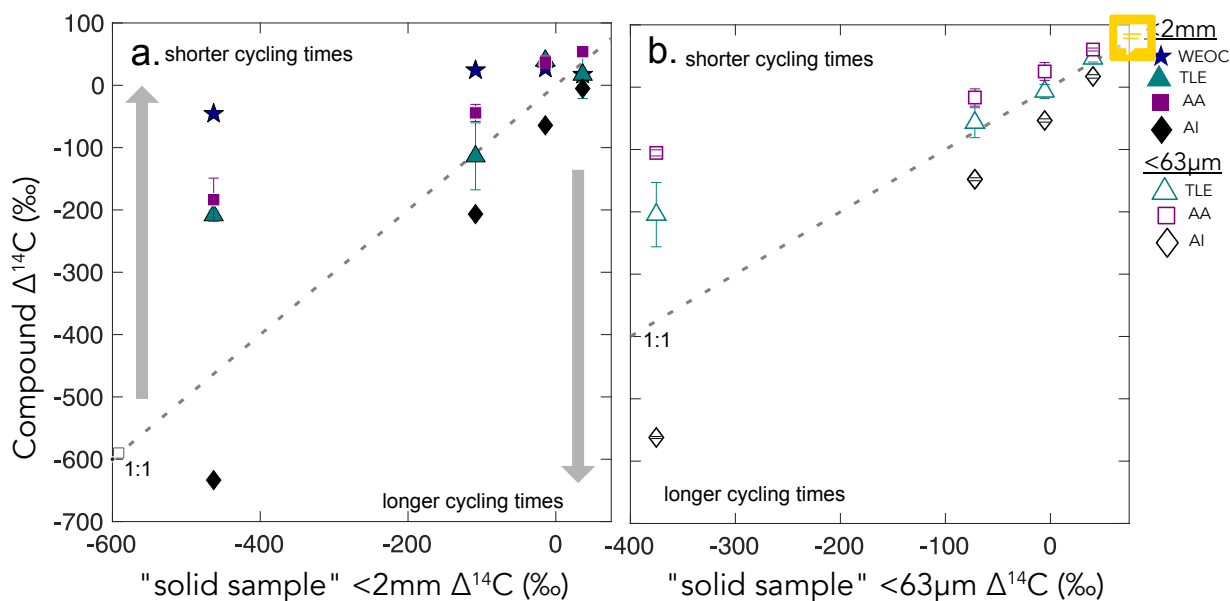

309

310 **Figure 4.**  $\Delta^{14}\text{C}$  values of the three extracted compound classes (y-axis) compared to the  $\Delta^{14}\text{C}$  values of the source fraction (x-axis) for a) bulk soil and b) silt+clay. The grey dashed lines show the 1:1 line where bulk sample  $\Delta^{14}\text{C}$  equals compound class  $\Delta^{14}\text{C}$ . Grey arrows point to regions where data plot above or below the 1:1 line, suggesting that a given compound class has shorter and longer carbon turnover times than bulk soil, respectively.

314

#### 315 4.2 Fast cycling OC throughout the depth profile

316 WEOC (extracted from bulk soils) and POC (<1g mL<sup>-1</sup> floated off the sand-size fraction) had the most enriched  $\Delta^{14}\text{C}$   
 317 values throughout the soil profile, reflecting a predominance of modern carbon from plant detritus and root exudates to these  
 318 pools. WEOC fractions can comprise a complex mixture of molecules with different structures (Hagedorn et al., 2004;  
 319 Bahureksa et al., 2021), which are common only in their ability to be mobilized and dissolved in water. WEOC can mobilize  
 320 and percolate down the soil profile with sufficient precipitation to allow vertical transport both the POC and WEOC fractions  
 321 supply OC that is readily accessible for microbial degradation and microbial utilization – resulting in the rapid turnover and  
 322 relatively high  $\Delta^{14}\text{C}$  values of these two pools (Marin-Spiotta et al., 2011). Occurrence of young OC in deep soils may be  
 323 driven by microbial uptake of this young and bioavailable DOC or POC. Additionally, we found that the free light-density  
 324 fractions were depleted in  $^{14}\text{C}$  relative to the WEOC and POC (Fig. 5). We suspect this is due to colloidal particles in the FLF,  
 325 which are not dispersed or dense enough to settle in the SPT.

326 The study site has a Mediterranean climate, and these soils undergo seasonal wetting and drying cycles. These cycles may  
 327 intensify in the future (Swain et al., 2018), potentially shifting the composition or amount of OC that percolates down the soil  
 328 column. When soil is already moist, subsequent rainfall may mobilize both OC and colloidal sized mineral material from  
 329 reducing conditions which may interact to form stable mineral-OC colloids which can enhance the transport of OC down the



330 soil profile and out of the system (Buettner et al., 2014). With prolonged dry periods, water soluble OC may be more  
 331 susceptible to microbial decomposition or oxidation. This seasonal wetting and drying mechanism likely controls what types  
 332 of organic matter are transported down the soil profile. Deeper in the soil profile, there is likely greater reactive mineral surface  
 333 area and less microbial activity, which can enhance carbon stabilization in subsoils (Homyak et al., 2018; Dwivedi et al., 2017;  
 334 Pries et al., 2023). Further research is needed to understand the effects of seasonal wetting and drying on the behaviour of  
 335 water-soluble OC in the soil profile.

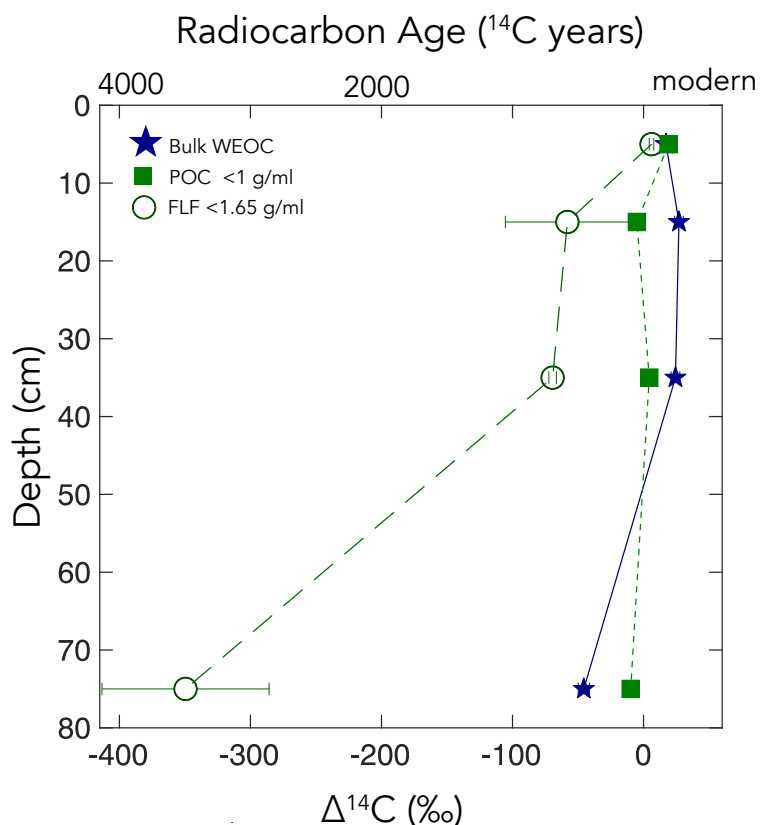

336

337 **Figure 5: POC (floated from the sand, n = 1), FLF (from bulk soil, n = 3, and error bars indicate standard error on the mean), and**  
 338 **WEOC (from bulk soil, n=1). Δ<sup>14</sup>C values by depth. For POC and WEOC, error bars indicate analytical error are generally smaller**  
 339 **than the symbols.**

340

### 341 4.3 Compound class Δ<sup>14</sup>C values in mineral-associated SOC

342  investigate the effect of mineral interaction on the Δ<sup>14</sup>C values or persistence of the TLE, AA, and AI, we measured  
 343 these extracted compound classes from physical fractions intended to yield approximate mineral-associated carbon pools. We  
 344 focused primarily on the silt+clay size fraction as the physical fraction that best approximates a mineral-associated OC pool  
 345 derived from microbially processed plant inputs (Poeplau et al., 2018; Lavalée et al., 2020) and assume that after size



346 fractionation most of the free organic matter in the bulk soil was in the sand size fraction. We compared the silt+clay size  
347 fraction  $\Delta^{14}\text{C}$  values to the bulk  $\Delta^{14}\text{C}$  values to determine if the material extracted from the isolated mineral-associated fractions  
348 of the soil had greater OC persistence or if these compounds cycled indiscriminate of mineral association (Fig. 2).

349 While the TLE from the silt+clay and bulk soil had similar  $\Delta^{14}\text{C}$  values, the AA from the silt+clay size fraction was  
350 enriched in  $^{14}\text{C}$  compared to the AA from bulk soil ( $r^2 = 0.98$ ,  $p < 0.05$ ). This suggests that AAs cycle faster in the silt+clay  
351 mineral pool than in the bulk soils. While mineral surfaces usually are thought to promote stability and persistence of OC, in  
352 some soil systems, mineral associations may not be the single defining factor of OC persistence (Rocci et al., 2021) and could  
353 have a more nuanced role influencing OC cycling in soils.

354 Our data suggests there is a continuum of compounds that exist with different  $^{14}\text{C}$  values in the mineral-associated pool,  
355 because in the silt+clay fraction, the TLE, AA, and AI have significantly different  $^{14}\text{C}$  values (Fig. 4b). For instance, the  
356 mineral-associated TLE and AA fractions are enriched in  $^{14}\text{C}$  relative to the silt+clay fraction, suggesting both are cycling  
357 faster than the average mineral associated pool. However, the AI from the silt+clay fraction is cycling slower than solid sample  
358 it was extracted from, and when we compare the AI from the bulk soil to the AI from the silt+clay, the AI from the silt+clay  
359 is slightly more  $^{14}\text{C}$  enriched. This suggests that there is slight  $^{14}\text{C}$  enrichment across all different compounds in the silt+clay  
360 fraction.

361 We also compared the TLE extracted from the silt+clay to that extracted from the DF. The mineral-associated fraction is  
362 not a uniformly defined pool and is also a consequence of the methodology used to separate the samples (Fig. 6). The DF TLE  
363  $\Delta^{14}\text{C}$  is significantly older than the silt+clay TLE (Fig. 6b). While the DF TLE could be influenced by methodological  
364 differences, such as artifacts from acidic SPT or grinding, it is still more  $^{14}\text{C}$  enriched at depth than the TLE of the bulk soil  
365 (Fig. 6), which is an indication that at the compound class level, lipids from mineral-associated OC pools still have multiple  
366 cycling rates. This is complementary to findings from other studies where  $^{14}\text{C}$  values from multiple different lipid biomarkers  
367 are divergent from the bulk soils (Gies et al., 2021) and could indicate the necessity of looking at entire compound class pools.  
368 These results warrant further investigation into the composition and age-distribution of compounds within mineral associated-  
369 OC.

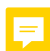



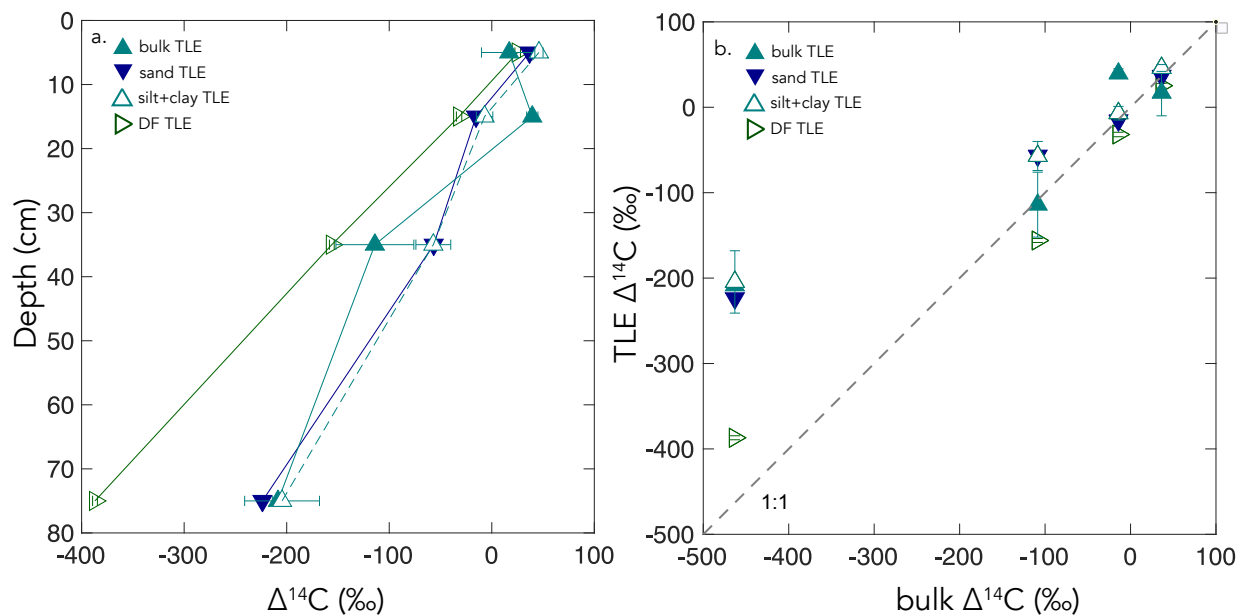

370

371 **Figure 6: a)  $\Delta^{14}\text{C}$  versus soil depth measured for TLE extractions from four soil size/density fractions. b) A comparison of the bulk**  
 372 **soil  $\Delta^{14}\text{C}$  values to the TLE from the four size/density fractions.**

373

#### 374 4.4 Persistent and Petrogenic OC

375 We found that the most  $^{14}\text{C}$  depleted OC fraction measured at each soil depth was the AI (Fig. 3, 4), the residual sample  
 376 after both the TLE and AA have been extracted (Wang et al., 1998; Wang et al., 2006). The AI fraction was far more depleted  
 377 relative to the bulk samples (Fig. 2) than other studies with marine acid-insoluble OC (Wang et al., 2006; Wang and Druffel,  
 378 2001). In the marine studies, the  $^{14}\text{C}$  is found to be quite variable in age depending on sampling depth or location. The  
 379 significant depletion of the AI in our soils suggests that these, chemically stable compounds, are not oxidized in soil.  
 380 Importantly, our AI samples are older than other chemical and physical soil fractions in the soil, which is consistent with the  
 381 finding that aromatic compounds can be difficult to degrade in soils (Ukalska-Jaruga et al., 2019).

382 Since the AI cycles much more slowly than other components of this grassland soil, it is important to understand what  
 383 structural components make up the AI and where these compounds are sourced from. The chemical structure of the AI fraction  
 384 has been difficult to characterize. Hwang and Druffel (2003) argued that the AI is a lipid-like portion of the ocean OC.  
 385 However, in soils, the AI can be composed of a mixture of lipid-like compounds and aromatic compounds (Silveira et al.,  
 386 2008). In our soil, the  $^{13}\text{C}$ -NMR spectra of the AI from 0-10 cm depth show a significant, broad peak in the 100–165 ppm  
 387 range, indicative aromatics (SI Fig. 3) (Baldock and Preston, 1995; Baldock et al., 1997). While it is possible that some  
 388 condensed aromatic compounds form during the hydrolysis procedure used to remove AAs, the AI may also contain naturally  
 389 occurring aromatic compounds that could include pyrogenic or petrogenic OC.



390 The parent material of our site is a mixture of sandstone, shale, graywacke, and schist (Foley et al., 2022), so it is possible  
391 that some of the OC in our soils is ancient, rock-derived, petrogenic carbon that has been incorporated into the soil profile  
392 through pedogenesis progresses (Grant et al., 2023). Comparison of the AI to the rock (>2 mm) fraction shows that the AI is  
393 younger than the OC contained in the rock fraction (SI Table 1), with the rock fraction  $\Delta^{14}\text{C}$  values ranging from 81 to -  
394 765‰. To calculate the contribution of  $\text{OC}_{\text{petro}}$  into the AI fraction, we used a binary mixing model with endmembers of  
395  $\text{OC}_{\text{petro}}$  and aged SOC based on the method in Grant et al. (2023). The  $\text{OC}_{\text{petro}}$   $^{14}\text{C}$  endmember was 00 ‰ and we compared  
396 and upper and lower range for the aged SOC  $^{14}\text{C}$  values using the TLE and bulk  $^{14}\text{C}$  values, respectively, from each depth. In  
397 the AI extracted from the silt+clay fraction, the  $\text{OC}_{\text{petro}}$  contribution was 4–5% from 0–10 cm depth and 40–53 % in the 50–  
398 100cm depth. In AI extracted from the bulk soil, the  $\text{OC}_{\text{petro}}$  contribution was 0–1 % in the 0–10 cm depth, and 17–44 % in the  
399 50–100 cm depth. Therefore, while the AI fraction likely contains  $\text{OC}_{\text{petro}}$ , it is primarily composed of OC compounds derived  
400 from more recent plant and microbial inputs that are highly resistant to acid hydrolysis either because of their chemical  
401 structure or their strong associations with minerals.

402

#### 403 4.5 Comparison of Fractionated Samples

404 We focus on the silt+clay fraction as an operationally defined mineral-associated OC pool. Numerous soil physical  
405 fractionation schemes have been applied to soils and disparities in methods challenge interpretation and intercomparison of  
406 results from different studies using different approaches. We compared our size-based approach to density fractionation of our  
407 soils to aid in interpretation and comparability of our findings to other studies. Our silt+clay fraction had higher  $\Delta^{14}\text{C}$  values  
408 than the sand, POC-free sand, and the DF. Our silt+clay fraction may include free organic matter that passed through the 63  
409  $\mu\text{m}$  sieve but that would have floated off the DF during density fractionation. We assume that this small-size free OC is a small  
410 fraction of the silt+clay OC as no small fragments of organic matter were visible and because the C:N ratios of the silt+clay  
411 fraction are only slightly elevated compared to both the bulk and sand fraction (SI Table S1). For reference, the FLF has high  
412 C:N reflecting the high OC content of this fraction (SI Table S1). Rather, the source of  $^{14}\text{C}$ -enriched in the silt+clay relative  
413 to the POC-free sand and bulk soil may be a result of higher surface area in the silt+clay for association of surface derived OC  
414 with minerals.

415 Additionally, our TLE comparison on different size and density fractions highlights the important influence that method  
416 selection has over experimental results. The mineral-associated TLE cycled more rapidly than the bulk soil no matter which  
417 “mineral-associated” fraction (the silt+clay or the DF) was chosen. The  $\Delta^{14}\text{C}$  values of TLE from the bulk, sand, and silt+clay  
418 were indistinguishable from one another, possibly because the size fractionation scheme did not effectively separate distinct  
419 lipid pools. However, the  $\Delta^{14}\text{C}$  values of TLE from the DF were significantly more  $^{14}\text{C}$  depleted than TLE from the silt+clay  
420 size fraction (Fig. 6), suggesting there were older lipids in the DF relative to the silt+clay. However, more depleted  $^{14}\text{C}$  values  
421 found in the TLE from the DF compared to the silt+clay could have resulted from the DF being exposed to SPT and/or  
422 ground after drying and before lipid extraction. It is possible that grinding the DF prior to lipid extraction increased the exposed  
423 surface area and resulted in a larger fraction of old SOC or rock-derived OC being incorporated into the TLE than if the DF



424 had not been ground. Clearly, the approach used to fractionate soils influences experimental results and must be considered  
425 when trying to understand how the persistence of OC changes in different defined soil OC pools.

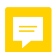

## 428 **5 Conclusions and Continued soil radiocarbon compound class characterization**

429 In this study, we characterized a soil carbon profile using compound-class  $^{14}\text{C}$  analyses. We found that our extraction  
430 methods yielded fractions with  $^{14}\text{C}$  signatures distinctly different from the bulk soil from which they were extracted. We found  
431 that in this grassland soil, the AA and the TLE fractions cycle more rapidly than the bulk soil throughout the soil profile. At  
432 each depth, the AI fraction is the oldest fraction and contains a combination of slowly cycling SOC and ancient petrogenic C.  
433 These results show that soil compound classes cycle differently than similar components in marine systems. Our results also  
434 show that mineral-associated SOC contains a mixture of carbon compounds with distinctly different ages and sources that  
435 drive turnover and persistence. Compound-specific  $^{14}\text{C}$  approaches hold promise for improving our understanding of the  
436 chemical structure of soil organic carbon, as well as the connection between carbon degradation and preservation in soils. A  
437 molecule-resolved understanding of the relationship between compound classes and carbon persistence will also give ins  
438 into the fate and turnover time of specific organic biomarkers found in plant residues or the biomass of bacteria, fungi and  
439 microfauna. These techniques can also help to determine mechanisms promoting mineral stabilization of soil carbon, especially  
440 when combined with soil physical fractionation.

441 Results from this study highlight that radiocarbon measurements of specific organic compounds and compound classes in  
442 soil provide valuable insights into the persistence and decomposition rates of soil organic carbon. To improve our ability to  
443 model the future of soil carbon stocks and soil quality in the face of a changing global climate, we need further research that  
444 interrogates the composition, radiocarbon content, and cycling rates of soil organic carbon and mechanistically links these  
445 rates to physical and chemical drivers.

## 447 **6 Acknowledgements**

448 This work was performed under the auspices of the U.S. Department of Energy by Lawrence Livermore National Laboratory  
449 under Contract DE-AC52-07NA27344 and was supported by the LLNL LDRD Program under Project No. 21-ERD-021.  
450 LLNL-JRNL-843138. We acknowledge the traditional, ancestral, unceded territory of the Shóqowa and Hopland People, on  
451 which this research was conducted. We thank the staff at the Hopland Research and Extension Center who manage the  
452 experiment site and Z Kagely for his assistance in digging the soil pit. Additional support for site access, sample collection,  
453 and site characterization data was provided by the U.S. Department of Energy, Office of Biological and Environmental  
454 Research, Genomic Sciences Program LLNL ‘Microbes Persist’ Scientific Focus Area (award #SCW1632).

## 456 **7 Supplemental Tables/Data Availability**

457 A list of all radiocarbon data, stable carbon, and total OC values with a CAMS tracking number for each of the analyses



458 used in this publication.

459 **8 Author Contributions:** KJM, KMF, TABB, JP, and KEG conceptualized the study. KJM, KMF, TABB, JP secured funding  
460 for the project. KEG designed the method and carried out the extractions with input from KJM, KMF, and TABB. CJL carried  
461 out the density separations. MNR carried out the water extractions. JDK and MM ran the NMR experiments. KEG, KJM,  
462 KMF interpreted the data. KEG prepared the paper with contributions of all co-authors.

463

464 **9 Competing interests.** The authors declare that they have no conflict of interest.

465

466

## 467 **References**

468

469 Agnelli, A., Trumbore, S. E., Corti, G., and Ugolini, F. C.: The dynamics of organic matter in rock fragments in soil  
470 investigated by  $^{14}\text{C}$  dating and measurements of  $^{13}\text{C}$ , *European Journal of Soil Science*, 53, 147-159,  
471 <https://doi.org/10.1046/j.1365-2389.2002.00432.x>, 2002.

472 Angst, G., Mueller, K. E., Nierop, K. G. J., and Simpson, M. J.: Plant- or microbial-derived? A review on the molecular  
473 composition of stabilized soil organic matter, *Soil Biology and Biochemistry*, 156, 10.1016/j.soilbio.2021.108189, 2021.

474 Angst, G., John, S., Mueller, C. W., Kögel-Knabner, I., and Rethemeyer, J.: Tracing the sources and spatial distribution of  
475 organic carbon in subsoils using a multi-biomarker approach, *Scientific Reports*, 6, 1-12, 2016.

476 Bahureksa, W., Tfaily, M. M., Boiteau, R. M., Young, R. B., Logan, M. N., McKenna, A. M., and Borch, T.: Soil Organic  
477 Matter Characterization by Fourier Transform Ion Cyclotron Resonance Mass Spectrometry (FTICR MS): A Critical Review  
478 of Sample Preparation, Analysis, and Data Interpretation, *Environmental Science & Technology*, 55, 9637-9656,  
479 10.1021/acs.est.1c01135, 2021.

480 Baldock, J. A. and Preston, C. M.: Chemistry of Carbon Decomposition Processes in Forests as Revealed by Solid-State  
481 Carbon-13 Nuclear Magnetic Resonance, in: *Carbon Forms and Functions in Forest Soils*, 89-117,  
482 <https://doi.org/10.2136/1995.carbonforms.c6>, 1995.

483 Baldock, J. A., Oades, J. M., Nelson, P. N., Skene, T. M., Golchin, A., and Clarke, P.: Assessing the extent of decomposition  
484 of natural organic materials using solid-state  $^{13}\text{C}$  NMR spectroscopy, *Soil Research*, 35, 1061-  
485 1084, <https://doi.org/10.1071/S97004>, 1997.

486 Bartolome, J. W., James Barry, W., Griggs, T., and Hopkinson, P.: 367Valley Grassland, in: *Terrestrial Vegetation of*  
487 *California*, edited by: Barbour, M., University of California Press, 0, 10.1525/california/9780520249554.003.0014, 2007.

488 Blattmann, T. M., Montluçon, D. B., Haghypour, N., Ishikawa, N. F., and Eglinton, T. I.: Liquid Chromatographic Isolation  
489 of Individual Amino Acids Extracted From Sediments for Radiocarbon Analysis, *Frontiers in Marine Science*, 7,  
490 10.3389/fmars.2020.00174, 2020.



- 491 Bour, A. L., Walker, B. D., Broek, T. A. B., and McCarthy, M. D.: Radiocarbon Analysis of Individual Amino Acids:  
492 Carbon Blank Quantification for a Small-Sample High-Pressure Liquid Chromatography Purification Method, *Analytical*  
493 *Chemistry*, 88, 3521-3528, 10.1021/acs.analchem.5b03619, 2016.
- 494 Broek, T. A. B., Ognibene, T. J., McFarlane, K. J., Moreland, K. C., Brown, T. A., and Bench, G.: Conversion of the  
495 LLNL/CAMS 1 MV biomedical AMS system to a semi-automated natural abundance <sup>14</sup>C spectrometer: system  
496 optimization and performance evaluation, *Nuclear Instruments and Methods in Physics Research Section B: Beam*  
497 *Interactions with Materials and Atoms*, 499, 124-132, 10.1016/j.nimb.2021.01.022, 2021.
- 498 Buettner, S. W., Kramer, M. G., Chadwick, O. A., and Thompson, A.: Mobilization of colloidal carbon during iron reduction  
499 in basaltic soils, *Geoderma*, 221-222, 139-145, <https://doi.org/10.1016/j.geoderma.2014.01.012>, 2014.
- 500 Coppola, A. I., Wiedemeier, D. B., Galy, V., Haghypour, N., Hanke, U. M., Nascimento, G. S., Usman, M., Blattmann, T.  
501 M., Reisser, M., Freymond, C. V., Zhao, M., Voss, B., Wacker, L., Schefuß, E., Peucker-Ehrenbrink, B., Abiven, S.,  
502 Schmidt, M. W. I., and Eglinton, T. I.: Global-scale evidence for the refractory nature of riverine black carbon, *Nature*  
503 *Geoscience*, 11, 584-588, 10.1038/s41561-018-0159-8, 2018.
- 504 De Troyer, I., Amery, F., Van Moorleghe, C., Smolders, E., and Merckx, R.: Tracing the source and fate of dissolved  
505 organic matter in soil after incorporation of a <sup>13</sup>C labelled residue: A batch incubation study, *Soil Biology and*  
506 *Biochemistry*, 43, 513-519, <https://doi.org/10.1016/j.soilbio.2010.11.016>, 2011.
- 507 Douglas, P. M. J., Pagani, M., Eglinton, T. I., Brenner, M., Curtis, J. H., Breckenridge, A., and Johnston, K.: A long-term  
508 decrease in the persistence of soil carbon caused by ancient Maya land use, *Nature Geoscience*, 11, 645-649,  
509 10.1038/s41561-018-0192-7, 2018.
- 510 Dwivedi, D., Riley, W., Torn, M., Spycher, N., Maggi, F., and Tang, J.: Mineral properties, microbes, transport, and plant-  
511 input profiles control vertical distribution and age of soil carbon stocks, *Soil Biology and Biochemistry*, 107, 244-259, 2017.
- 512 Eglinton, T. I., Galy, V. V., Hemingway, J. D., Feng, X., Bao, H., Blattmann, T. M., Dickens, A. F., Gies, H., Giosan, L.,  
513 Haghypour, N., Hou, P., Lupker, M., McIntyre, C. P., Montluçon, D. B., Peucker-Ehrenbrink, B., Ponton, C., Schefuss, E.,  
514 Schwab, M. S., Voss, B. M., Wacker, L., Wu, Y., and Zhao, M.: Climate control on terrestrial biospheric carbon turnover,  
515 *Proc Natl Acad Sci U S A*, 118, 10.1073/pnas.2011585118, 2021.
- 516 Feng, X., Vonk, J. E., Griffin, C., Zimov, N., Montluçon, D. B., Wacker, L., and Eglinton, T. I.: <sup>14</sup>C Variation of Dissolved  
517 Lignin in Arctic River Systems, *ACS Earth and Space Chemistry*, 1, 334-344, 10.1021/acsearthspacechem.7b00055, 2017.
- 518 Feng, X., Benitez-Nelson, B. C., Montluçon, D. B., Prahl, F. G., McNichol, A. P., Xu, L., Repeta, D. J., and Eglinton, T. I.:  
519 <sup>14</sup>C and <sup>13</sup>C characteristics of higher plant biomarkers in Washington margin surface sediments, *Geochimica et*  
520 *Cosmochimica Acta*, 105, 14-30, <https://doi.org/10.1016/j.gca.2012.11.034>, 2013.
- 521 Foley, M. M., Blazewicz, S. J., McFarlane, K. J., Greenlon, A., Hayer, M., Kimbrel, J. A., Koch, B. J., Monsaint-Queeney,  
522 V., Morrison, K., Morrissey, E., Hungate, B. A., and Pett-Ridge, J.: Active populations and growth of soil microorganisms  
523 are framed by mean annual precipitation in three California annual grasslands, *Soil Biology and Biochemistry*, 108886,  
524 <https://doi.org/10.1016/j.soilbio.2022.108886>, 2022.
- 525 Galy, V., Peucker-Ehrenbrink, B., and Eglinton, T.: Global carbon export from the terrestrial biosphere controlled by  
526 erosion, *Nature*, 521, 204-207, 10.1038/nature14400, 2015.
- 527 Galy, V., Beyssac, O., France-Lanord, C., and Eglinton, T.: Recycling of Graphite During Himalayan Erosion: A Geological  
528 Stabilization of Carbon in the Crust, *Science*, 322, 943-945, doi:10.1126/science.1161408, 2008.



- 529 Gaudinski, J. B., Trumbore, S. E., Davidson, E. A., and Zheng, S.: Soil carbon cycling in a temperate forest: radiocarbon-  
530 based estimates of residence times, sequestration rates and partitioning of fluxes, *Biogeochemistry*, 51, 33-69,  
531 10.1023/A:1006301010014, 2000.
- 532 Gies, H., Hagedorn, F., Lupker, M., Montluçon, D., Haghypour, N., van der Voort, T. S., and Eglinton, T. I.: Millennial-age  
533 glycerol dialkyl glycerol tetraethers (GDGTs) in forested mineral soils: 14C-based evidence for stabilization of microbial  
534 necromass, *Biogeosciences*, 18, 189-205, 10.5194/bg-18-189-2021, 2021.
- 535 Gleixner, G.: Soil organic matter dynamics: a biological perspective derived from the use of compound-specific isotopes  
536 studies, *Ecological Research*, 28, 683-695, 2013.
- 537 Grant, K. E., Hilton, R. G., and Galy, V. V.: Global patterns of radiocarbon depletion in subsoil linked to rock-derived  
538 organic carbon, *Geochemical Perspectives Letters*, 25, 36-40, <https://doi.org/10.7185/geochemlet.2312>, 2023.
- 539 Grant, K. E., Galy, V. V., Haghypour, N., Eglinton, T. I., and Derry, L. A.: Persistence of old soil carbon under changing  
540 climate: The role of mineral-organic matter interactions, *Chemical Geology*, 587, 10.1016/j.chemgeo.2021.120629, 2022.
- 541 Hagedorn, F., Saurer, M., and Blaser, P.: A 13C tracer study to identify the origin of dissolved organic carbon in forested  
542 mineral soils, *European Journal of Soil Science*, 55, 91-100, <https://doi.org/10.1046/j.1365-2389.2003.00578.x>, 2004.
- 543 Hein, C. J., Usman, M., Eglinton, T. I., Haghypour, N., and Galy, V. V.: Millennial-scale hydroclimate control of tropical  
544 soil carbon storage, *Nature*, 581, 63-66, 10.1038/s41586-020-2233-9, 2020.
- 545 Homyak, P. M., Blankinship, J. C., Slessarev, E. W., Schaeffer, S. M., Manzoni, S., and Schimel, J. P.: Effects of altered dry  
546 season length and plant inputs on soluble soil carbon, *Ecology*, 99, 2348-2362, <https://doi.org/10.1002/ecy.2473>, 2018.
- 547 Hua, Q., Turnbull, J. C., Santos, G. M., Rakowski, A. Z., Ancapichún, S., De Pol-Holz, R., Hammer, S., Lehman, S. J.,  
548 Levin, I., Miller, J. B., Palmer, J. G., and Turney, C. S. M.: ATMOSPHERIC RADIOCARBON FOR THE PERIOD 1950–  
549 2019, *Radiocarbon*, 64, 723-745, 10.1017/RDC.2021.95, 2022.
- 550 Huang, Y., Bol, R., Harkness, D. D., Ineson, P., and Eglinton, G.: Post-glacial variations in distributions, 13C and 14C  
551 contents of aliphatic hydrocarbons and bulk organic matter in three types of British acid upland soils, *Organic Geochemistry*,  
552 24, 273-287, [http://dx.doi.org/10.1016/0146-6380\(96\)00039-3](http://dx.doi.org/10.1016/0146-6380(96)00039-3), 1996.
- 553 Hwang, J. and Druffel, E. R. M.: Lipid-Like Material as the Source of the Uncharacterized Organic Carbon in the Ocean?,  
554 *Science*, 299, 881-884, doi:10.1126/science.1078508, 2003.
- 555 Ishikawa, N. F., Itahashi, Y., Blattmann, T. M., Takano, Y., Ogawa, N. O., Yamane, M., Yokoyama, Y., Nagata, T., Yoneda,  
556 M., Haghypour, N., Eglinton, T. I., and Ohkouchi, N.: Improved Method for Isolation and Purification of Underivatized  
557 Amino Acids for Radiocarbon Analysis, *Analytical Chemistry*, 90, 12035-12041, 10.1021/acs.analchem.8b02693, 2018.
- 558 Jia, J., Liu, Z., Haghypour, N., Wacker, L., Zhang, H., Sierra, C. A., Ma, T., Wang, Y., Chen, L., Luo, A., Wang, Z., He, J.-  
559 S., Zhao, M., Eglinton, T. I., and Feng, X.: Molecular 14C evidence for contrasting turnover and temperature sensitivity of  
560 soil organic matter components, *Ecology Letters*, 26, 778-788, <https://doi.org/10.1111/ele.14204>, 2023.
- 561 Jobbágy, E. G. and Jackson, R. B.: THE VERTICAL DISTRIBUTION OF SOIL ORGANIC CARBON AND ITS  
562 RELATION TO CLIMATE AND VEGETATION, *Ecological Applications*, 10, 423-436, [https://doi.org/10.1890/1051-0761\(2000\)010\[0423:TVDOSO\]2.0.CO;2](https://doi.org/10.1890/1051-0761(2000)010[0423:TVDOSO]2.0.CO;2), 2000.



- 564 Keiluweit, M., Bougoure, J. J., Nico, P. S., Pett-Ridge, J., Weber, P. K., and Kleber, M.: Mineral protection of soil carbon  
565 counteracted by root exudates, *Nature Climate Change*, 5, 588-595, 2015.
- 566 Kleber, M., Sollins, P., and Sutton, R.: A conceptual model of organo-mineral interactions in soils: self-assembly of organic  
567 molecular fragments into zonal structures on mineral surfaces, *Biogeochemistry*, 85, 9-24, 2007.
- 568 Kögel-Knabner, I.: The macromolecular organic composition of plant and microbial residues as inputs to soil organic matter,  
569 *Soil Biology and Biochemistry*, 34, 139-162, [https://doi.org/10.1016/S0038-0717\(01\)00158-4](https://doi.org/10.1016/S0038-0717(01)00158-4), 2002.
- 570 Kotanen, P. M.: Revegetation following Soil Disturbance and Invasion in a Californian Meadow: a 10-year History of  
571 Recovery, *Biological Invasions*, 6, 245-254, 10.1023/B:BINV.0000022145.03215.4f, 2004.
- 572 Kuzyakov, Y., Bogomolova, I., and Glaser, B.: Biochar stability in soil: Decomposition during eight years and  
573 transformation as assessed by compound-specific <sup>14</sup>C analysis, *Soil Biology and Biochemistry*, 70, 229-236,  
574 <http://dx.doi.org/10.1016/j.soilbio.2013.12.021>, 2014.
- 575 Lavalley, J. M., Soong, J. L., and Cotrufo, M. F.: Conceptualizing soil organic matter into particulate and mineral-associated  
576 forms to address global change in the 21st century, *Global Change Biology*, 26, 261-273, <https://doi.org/10.1111/gcb.14859>,  
577 2020.
- 578 Lechleitner, F. A., Baldini, J. U. L., Breitenbach, S. F. M., Fohlmeister, J., McIntyre, C., Goswami, B., Jamieson, R. A., van  
579 der Voort, T. S., Prufer, K., Marwan, N., Culleton, B. J., Kennett, D. J., Asmerom, Y., Polyak, V., and Eglinton, T. I.:  
580 Hydrological and climatological controls on radiocarbon concentrations in a tropical stalagmite, *Geochimica et*  
581 *Cosmochimica Acta*, 194, 233-252, <https://doi.org/10.1016/j.gca.2016.08.039>, 2016.
- 582 Lehmann, J. and Kleber, M.: The contentious nature of soil organic matter, *Nature*, 528, 60-68, 10.1038/nature16069, 2015.
- 583 Lehmann, J., Hansel, C. M., Kaiser, C., Kleber, M., Maher, K., Manzoni, S., Nunan, N., Reichstein, M., Schimel, J. P., Torn,  
584 M. S., Wieder, W. R., and Kögel-Knabner, I.: Persistence of soil organic carbon caused by functional complexity, *Nature*  
585 *Geoscience*, 13, 529-534, 10.1038/s41561-020-0612-3, 2020.
- 586 Loh, A. N., Bauer, J. E., and Druffel, E. R. M.: Variable ageing and storage of dissolved organic components in the open  
587 ocean, *Nature*, 430, 877-881, 10.1038/nature02780, 2004.
- 588 Lützow, M. v., Kögel-Knabner, I., Ekschmitt, K., Matzner, E., Guggenberger, G., Marschner, B., and Flessa, H.:  
589 Stabilization of organic matter in temperate soils: mechanisms and their relevance under different soil conditions - a review,  
590 *European Journal of Soil Science*, 57, 426-445, 10.1111/j.1365-2389.2006.00809.x, 2006.
- 591 Marin-Spiotta, E., Chadwick, O. A., Kramer, M., and Carbone, M. S.: Carbon delivery to deep mineral horizons in Hawaiian  
592 rain forest soils, *Journal of Geophysical Research: Biogeosciences*, 116, 2011.
- 593 McFarlane, K. J., Torn, M. S., Hanson, P. J., Porras, R. C., Swanston, C. W., Callahan, M. A., and Guilderson, T. P.:  
594 Comparison of soil organic matter dynamics at five temperate deciduous forests with physical fractionation and radiocarbon  
595 measurements, *Biogeochemistry*, 112, 457-476, 10.1007/s10533-012-9740-1, 2013.
- 596 Mikutta, R., Mikutta, C., Kalbitz, K., Scheel, T., Kaiser, K., and Jahn, R.: Biodegradation of forest floor organic matter  
597 bound to minerals via different binding mechanisms, *Geochimica et Cosmochimica Acta*, 71, 2569-2590, 2007.
- 598 Moe, L. A.: Amino acids in the rhizosphere: From plants to microbes, *American Journal of Botany*, 100, 1692-1705,  
599 <https://doi.org/10.3732/ajb.1300033>, 2013.



- 600 Nuccio, E. E., Anderson-Furgeson, J., Estera, K. Y., Pett-Ridge, J., De Valpine, P., Brodie, E. L., and Firestone, M. K.:  
601 Climate and edaphic controllers influence rhizosphere community assembly for a wild annual grass, *Ecology*, 97, 1307-  
602 1318, 10.1890/15-0882.1, 2016.
- 603 Poeplau, C., Don, A., Six, J., Kaiser, M., Benbi, D., Chenu, C., Cotrufo, M. F., Derrien, D., Gioacchini, P., Grand, S.,  
604 Gregorich, E., Griepentrog, M., Gunina, A., Haddix, M., Kuzyakov, Y., Kühnel, A., Macdonald, L. M., Soong, J., Trigalet,  
605 S., Vermeire, M.-L., Rovira, P., van Wesemael, B., Wiesmeier, M., Yeasmin, S., Yevdokimov, I., and Nieder, R.: Isolating  
606 organic carbon fractions with varying turnover rates in temperate agricultural soils – A comprehensive method comparison,  
607 *Soil Biology and Biochemistry*, 125, 10-26, <https://doi.org/10.1016/j.soilbio.2018.06.025>, 2018.
- 608 Pries, C. E. H., Ryals, R., Zhu, B., Min, K., Cooper, A., Goldsmith, S., Pett-Ridge, J., Torn, M., and Berhe, A. A.: The Deep  
609 Soil Organic Carbon Response to Global Change, *Annual Review of Ecology, Evolution, and Systematics*, 54, 375-401,  
610 10.1146/annurev-ecolsys-102320-085332, 2023.
- 611 R Core Team: R: A language and environment for statistical computing., R Foundation for Statistical Computing [code],  
612 2019.
- 613 Repasch, M., Scheingross, J. S., Hovius, N., Lupker, M., Wittmann, H., Haghypour, N., Gröcke, D. R., Orfeo, O., Eglinton,  
614 T. I., and Sachse, D.: Fluvial organic carbon cycling regulated by sediment transit time and mineral protection, *Nature*  
615 *Geoscience*, 14, 842-848, 10.1038/s41561-021-00845-7, 2021.
- 616 Rethemeyer, J., Kramer, C., Gleixner, G., Wiesenberger, G. L. B., Schwark, L., Andersen, N., Nadeau, M.-J., and Grootes, P.  
617 M.: Complexity of Soil Organic Matter: AMS 14C Analysis of Soil Lipid Fractions and Individual Compounds,  
618 *Radiocarbon*, 46, 465-473, 10.1017/S0033822200039771, 2004.
- 619 Rocci, K. S., Lavallee, J. M., Stewart, C. E., and Cotrufo, M. F.: Soil organic carbon response to global environmental  
620 change depends on its distribution between mineral-associated and particulate organic matter: A meta-analysis, *Science of*  
621 *The Total Environment*, 793, 148569, <https://doi.org/10.1016/j.scitotenv.2021.148569>, 2021.
- 622 Schmidt, M. W., Torn, M. S., Abiven, S., Dittmar, T., Guggenberger, G., Janssens, I. A., Kleber, M., Kögel-Knabner, I.,  
623 Lehmann, J., and Manning, D. A.: Persistence of soil organic matter as an ecosystem property, *Nature*, 478, 49-56, 2011.
- 624 Shi, Z., Allison, S. D., He, Y., Levine, P. A., Hoyt, A. M., Beem-Miller, J., Zhu, Q., Wieder, W. R., Trumbore, S., and  
625 Randerson, J. T.: The age distribution of global soil carbon inferred from radiocarbon measurements, *Nature Geoscience*, 13,  
626 555-559, 2020.
- 627 Sierra, C. A., Müller, M., and Trumbore, S. E.: Modeling radiocarbon dynamics in soils: SoilR version 1.1, *Geoscientific*  
628 *Model Development*, 7, 1919-1931, 10.5194/gmd-7-1919-2014, 2014.
- 629 Silveira, M. L., Comerford, N. B., Reddy, K. R., Cooper, W. T., and El-Rifai, H.: Characterization of soil organic carbon  
630 pools by acid hydrolysis, *Geoderma*, 144, 405-414, <https://doi.org/10.1016/j.geoderma.2008.01.002>, 2008.
- 631 Stoner, S., Trumbore, S. E., González-Pérez, J. A., Schrupf, M., Sierra, C. A., Hoyt, A. M., Chadwick, O., and Doetterl, S.:  
632 Relating mineral–organic matter stabilization mechanisms to carbon quality and age distributions using ramped thermal  
633 analysis, *Philosophical Transactions of the Royal Society A: Mathematical, Physical and Engineering Sciences*, 381,  
634 20230139, doi:10.1098/rsta.2023.0139, 2023.
- 635 Stuiver, M. and Polach, H. A.: Discussion Reporting of 14C Data, *Radiocarbon*, 19, 355-363, 10.1017/s0033822200003672,  
636 1977.





- 637 Swain, D. L., Langenbrunner, B., Neelin, J. D., and Hall, A.: Increasing precipitation volatility in twenty-first-century  
638 California, *Nature Climate Change*, 8, 427-433, 10.1038/s41558-018-0140-y, 2018.
- 639 Torn, M. S., Swanston, C. W., Castanha, C., and Trumbore, S. E.: Storage and Turnover of Organic Matter in Soil, in:  
640 Biophysico-Chemical Processes Involving Natural Nonliving Organic Matter in Environmental Systems, edited by: Senesi,  
641 N., Xing, B., and Huang, P. M., Wiley-IUPAC series in biophysico-chemical processes in environmental systems, John Wiley  
642 & Sons, Inc., Hoboken, New Jersey, 219-272, 2009.
- 643 Trumbore, S.: Age of Soil Organic Matter and Soil Respiration: Radiocarbon Constraints on Belowground C Dynamics,  
644 *Ecological Applications - ECOL APPL*, 10, 399-411, 10.2307/2641102, 2000.
- 645 Trumbore, S. E. and Harden, J. W.: Accumulation and turnover of carbon in organic and mineral soils of the BOREAS  
646 northern study area, *Journal of Geophysical Research: Atmospheres*, 102, 28817-28830, 10.1029/97jd02231, 1997.
- 647 Trumbore, S. E. and Zheng, S.: Comparison of Fractionation Methods for Soil Organic Matter 14C Analysis, *Radiocarbon*,  
648 38, 219-229, 10.1017/s0033822200017598, 1996.
- 649 Ukalska-Jaruga, A., Smreczak, B., and Klimkowicz-Pawlas, A.: Soil organic matter composition as a factor affecting the  
650 accumulation of polycyclic aromatic hydrocarbons, *Journal of Soils and Sediments*, 19, 1890-1900, 10.1007/s11368-018-  
651 2214-x, 2019.
- 652 van der Voort, T. S., Mannu, U., Hagedorn, F., McIntyre, C., Walthert, L., Schleppei, P., Haghypour, N., and Eglinton, T. I.:  
653 Dynamics of deep soil carbon – insights from 14C time series across a climatic gradient, *Biogeosciences*, 16, 3233-3246,  
654 10.5194/bg-16-3233-2019, 2019.
- 655 van der Voort, T. S., Zell, C. I., Hagedorn, F., Feng, X., McIntyre, C. P., Haghypour, N., Graf Pannatier, E., and Eglinton, T.  
656 I.: Diverse Soil Carbon Dynamics Expressed at the Molecular Level, *Geophysical Research Letters*, 44, 11,840-811,850,  
657 10.1002/2017gl076188, 2017.
- 658 Vogel, C., Mueller, C. W., Höschen, C., Buegger, F., Heister, K., Schulz, S., Schloter, M., and Kögel-Knabner, I.:  
659 Submicron structures provide preferential spots for carbon and nitrogen sequestration in soils, *Nature Communications*, 5,  
660 2014.
- 661 Vogel, J. S., Southon, J. R., Nelson, D. E., and Brown, T. A.: Performance of catalytically condensed carbon for use in  
662 accelerator mass spectrometry, *Nuclear Instruments and Methods in Physics Research Section B: Beam Interactions with  
663 Materials and Atoms*, 5, 289-293, [https://doi.org/10.1016/0168-583X\(84\)90529-9](https://doi.org/10.1016/0168-583X(84)90529-9), 1984.
- 664 von Lutzow, M., Kögel-Knabner, I., Ekschmitt, K., Flessa, H., Guggenberger, G., Matzner, E., and Marschner, B.: SOM  
665 fractionation methods: Relevance to functional pools and to stabilization mechanisms, *Soil Biology and Biochemistry*, 39,  
666 2183-2207, 2007.
- 667 Wang, X.-C. and Druffel, E. R. M.: Radiocarbon and stable carbon isotope compositions of organic compound classes in  
668 sediments from the NE Pacific and Southern Oceans, *Marine Chemistry*, 73, 65-81, [https://doi.org/10.1016/S0304-  
669 4203\(00\)00090-6](https://doi.org/10.1016/S0304-4203(00)00090-6), 2001.
- 670 Wang, X.-C., Callahan, J., and Chen, R. F.: Variability in radiocarbon ages of biochemical compound classes of high  
671 molecular weight dissolved organic matter in estuaries, *Estuarine, Coastal and Shelf Science*, 68, 188-194,  
672 10.1016/j.ecss.2006.01.018, 2006.

<https://doi.org/10.5194/egusphere-2023-3125>

Preprint. Discussion started: 8 January 2024

© Author(s) 2024. CC BY 4.0 License.

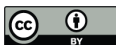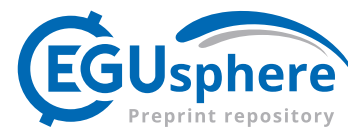

673 Wang, X.-C., Druffel, E. R. M., Griffin, S., Lee, C., and Kashgarian, M.: Radiocarbon studies of organic compound classes  
674 in plankton and sediment of the northeastern Pacific Ocean, *Geochimica et Cosmochimica Acta*, 62, 1365-1378,  
675 [https://doi.org/10.1016/S0016-7037\(98\)00074-X](https://doi.org/10.1016/S0016-7037(98)00074-X), 1998.

676

677
